# Supplementary material
Source: publisher site journal article supplement (https://bdj.pensoft.net/article/download/suppl/5949656/)

**Supplementary file 3 –Ecological niche models of 42 *Salvia* species.** The points on each map show the collecting localities.

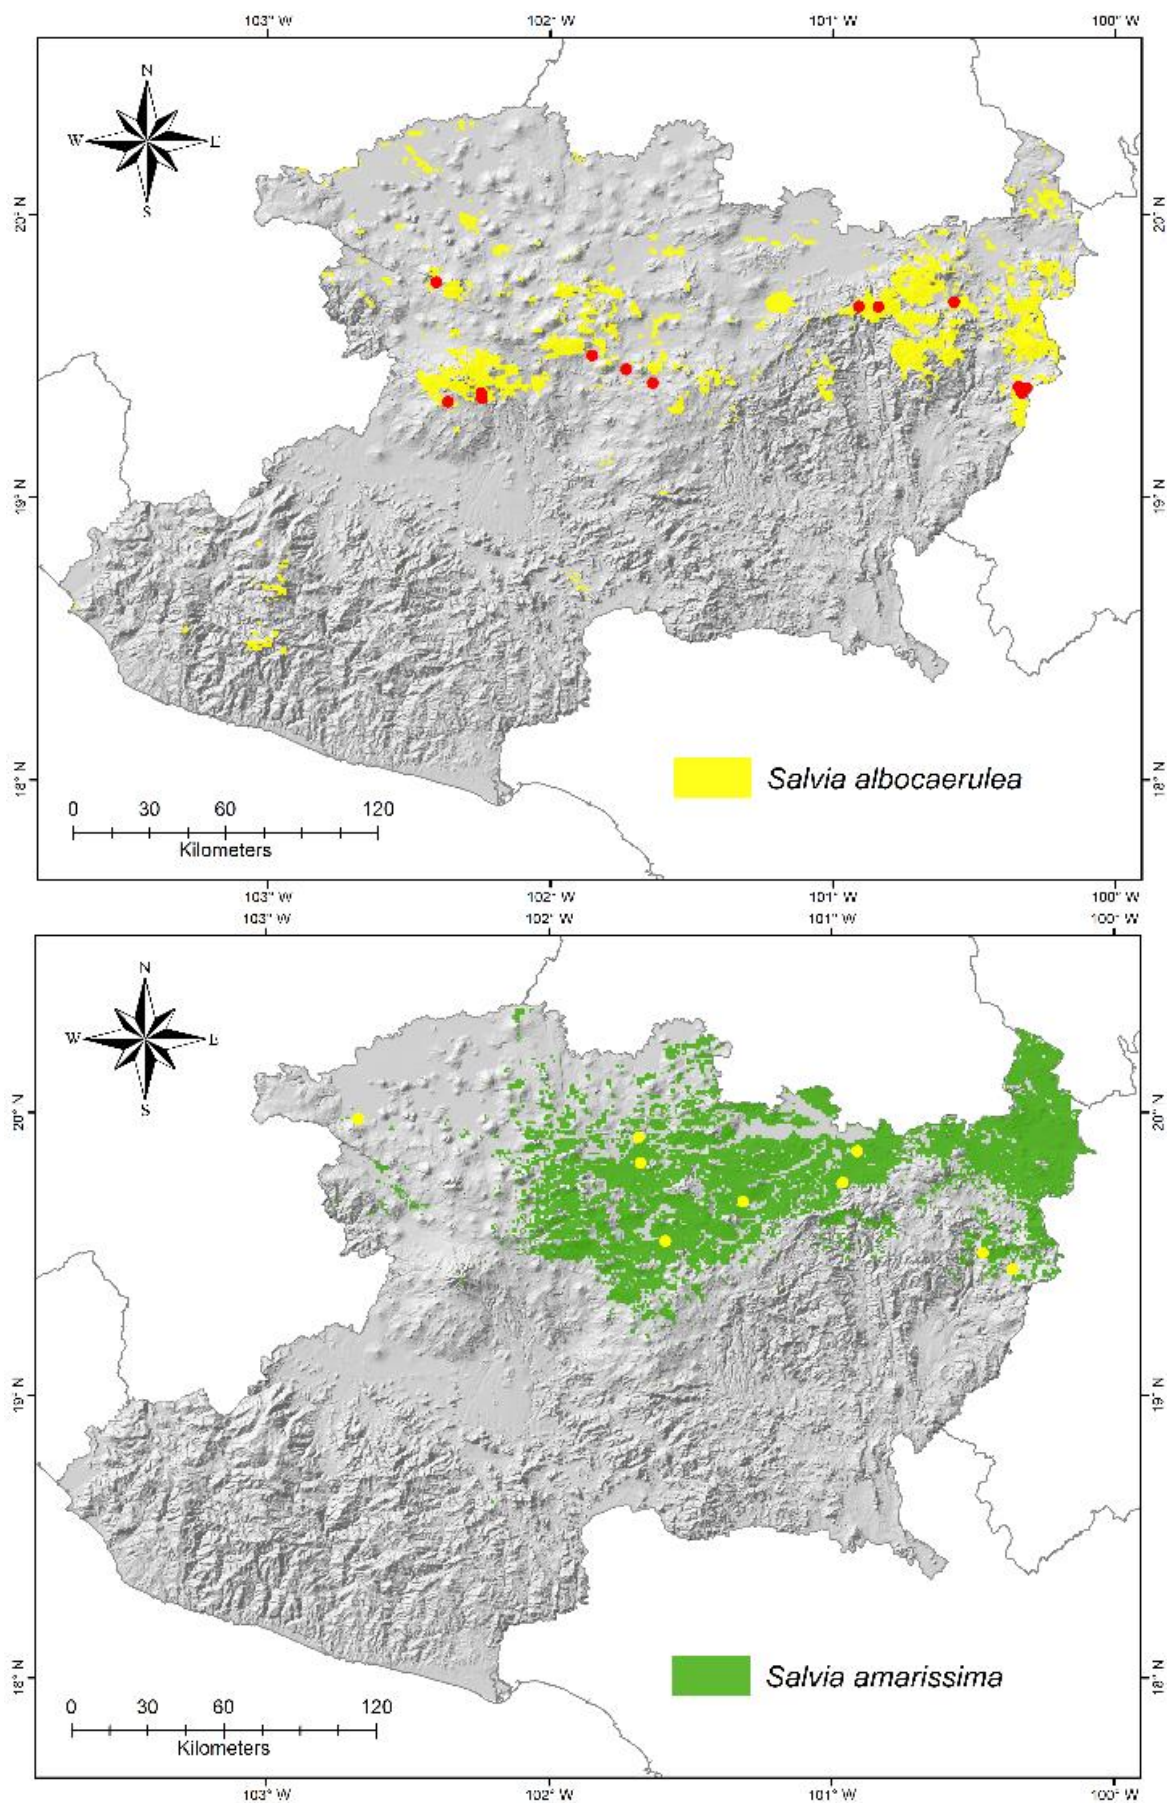

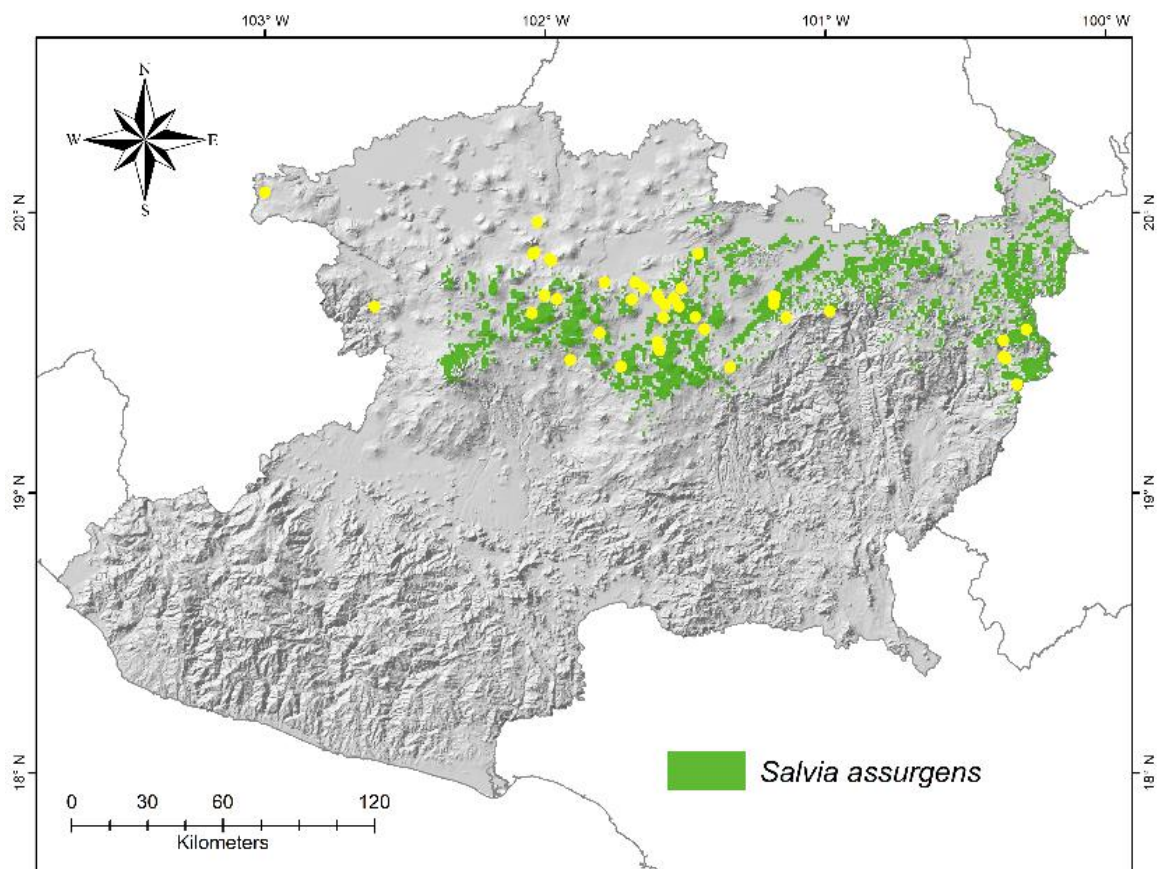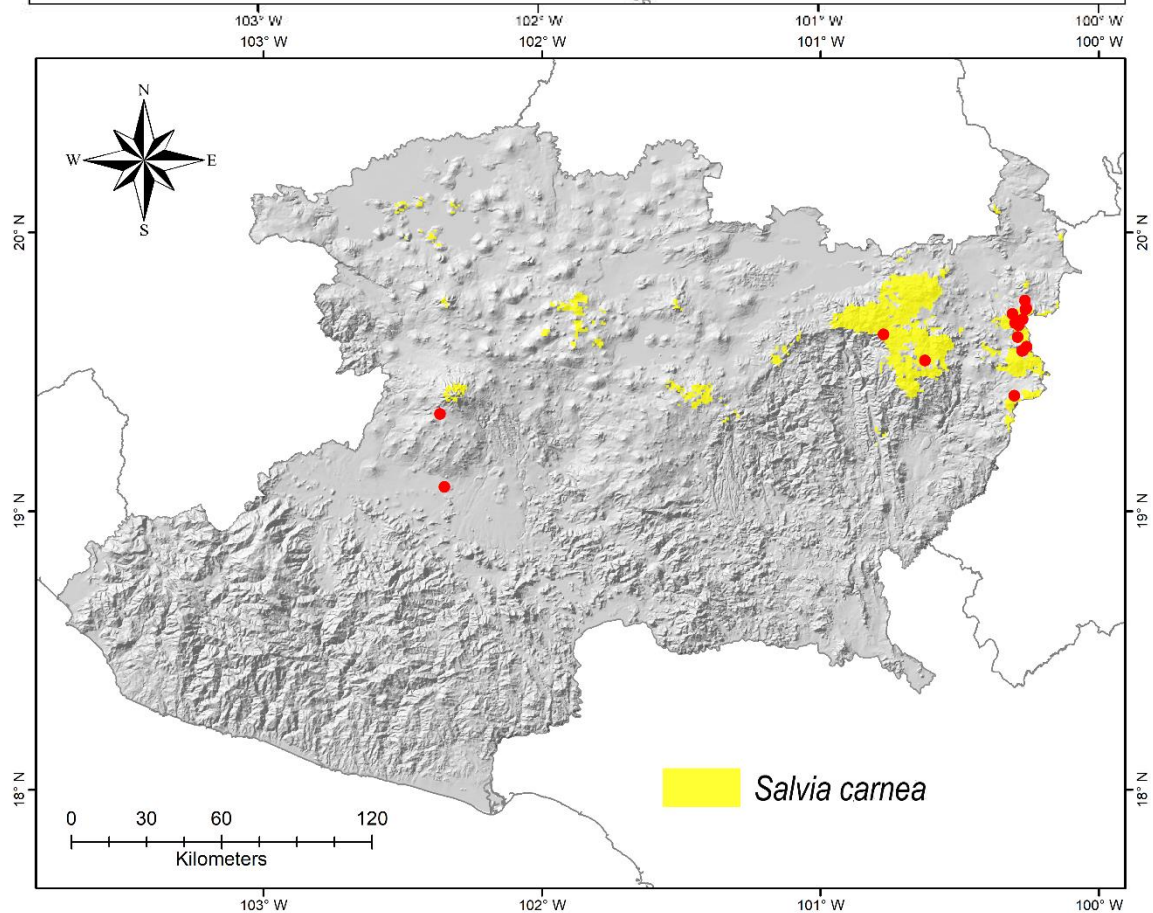



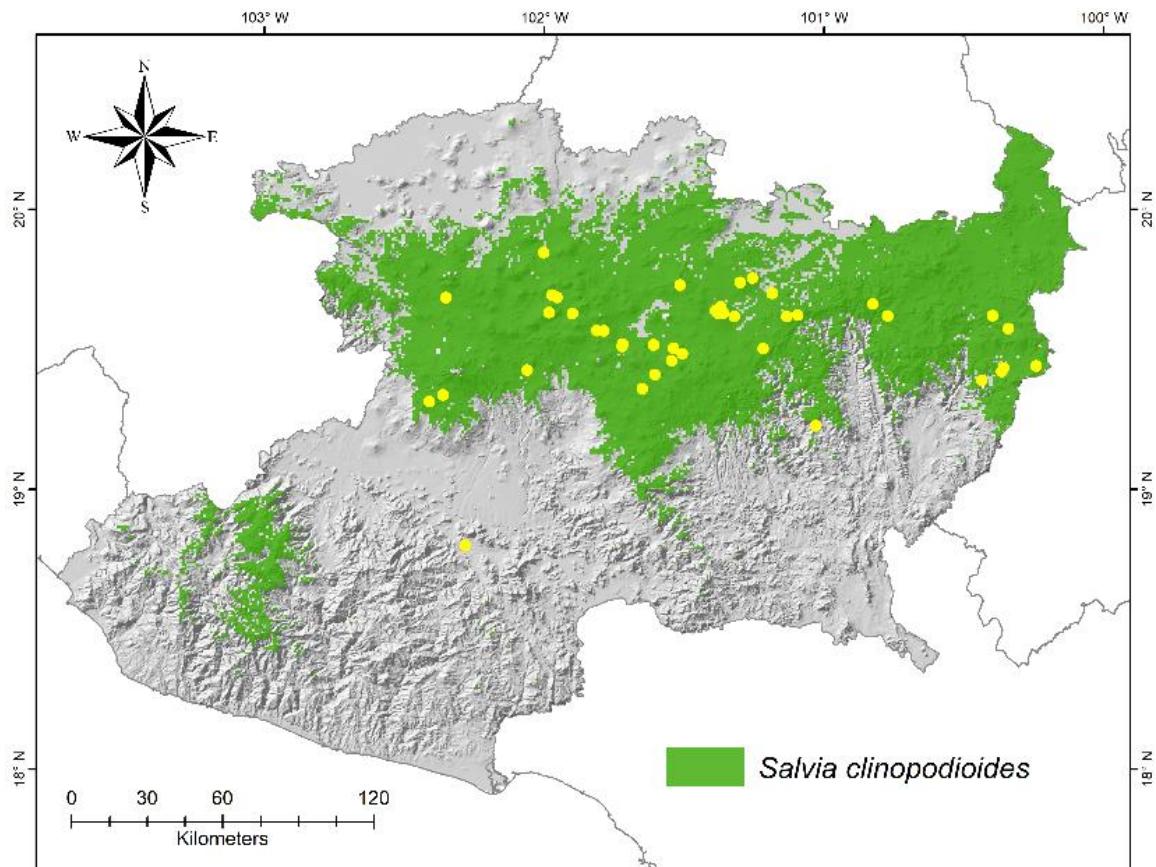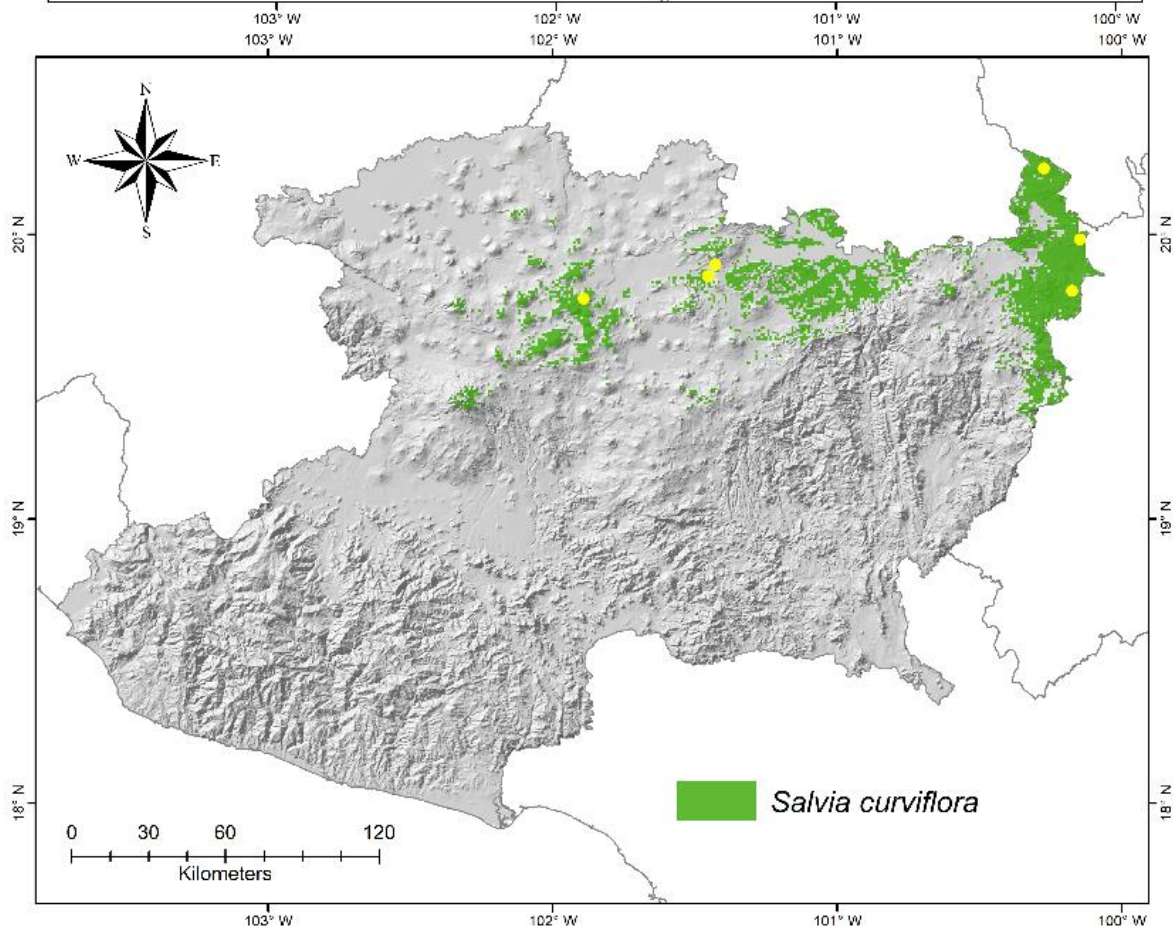

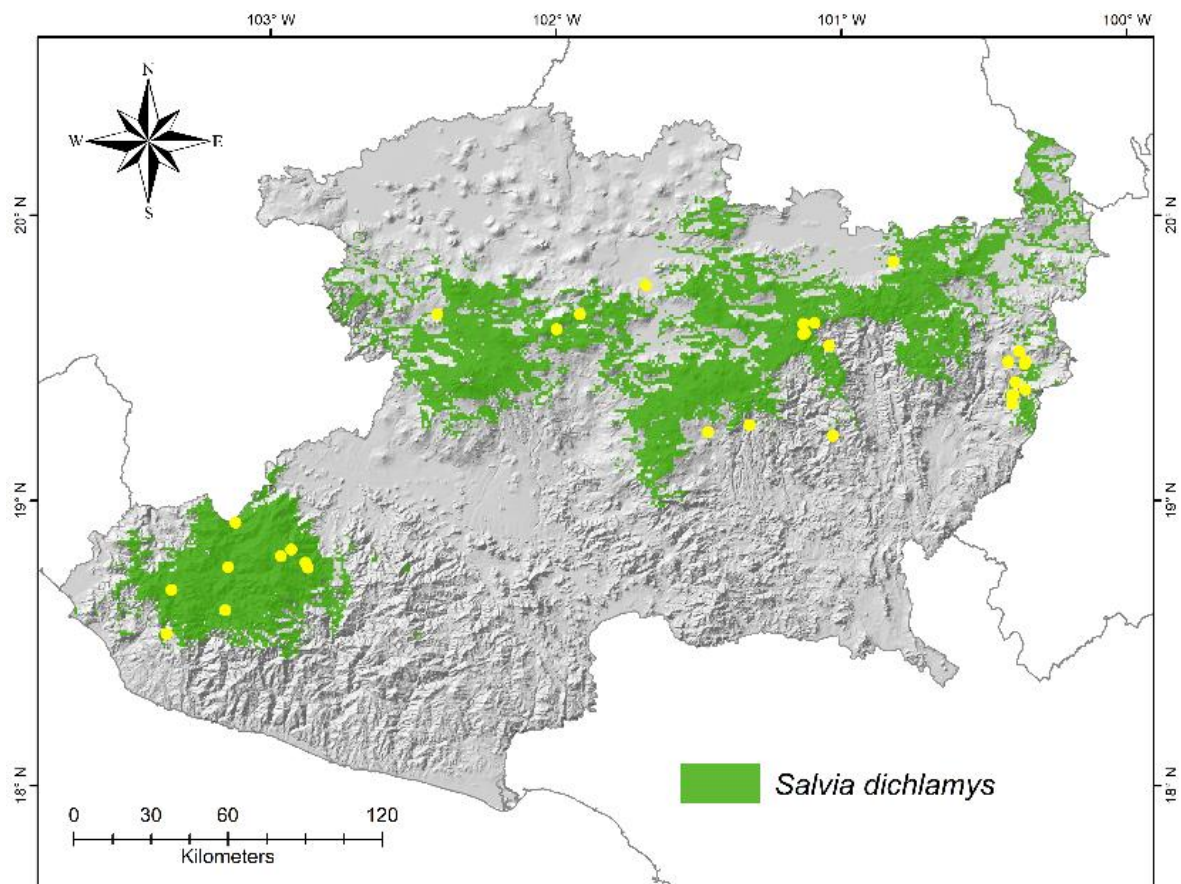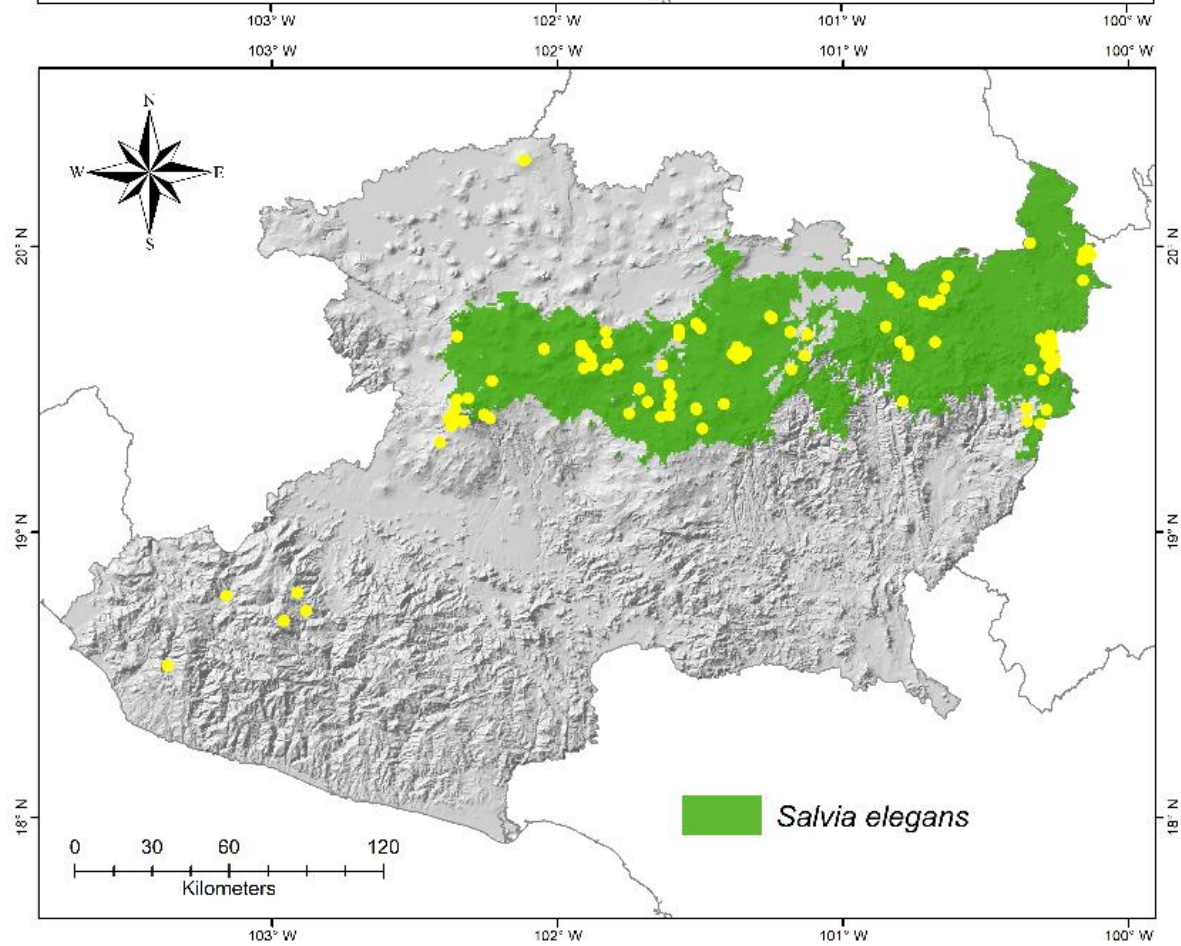



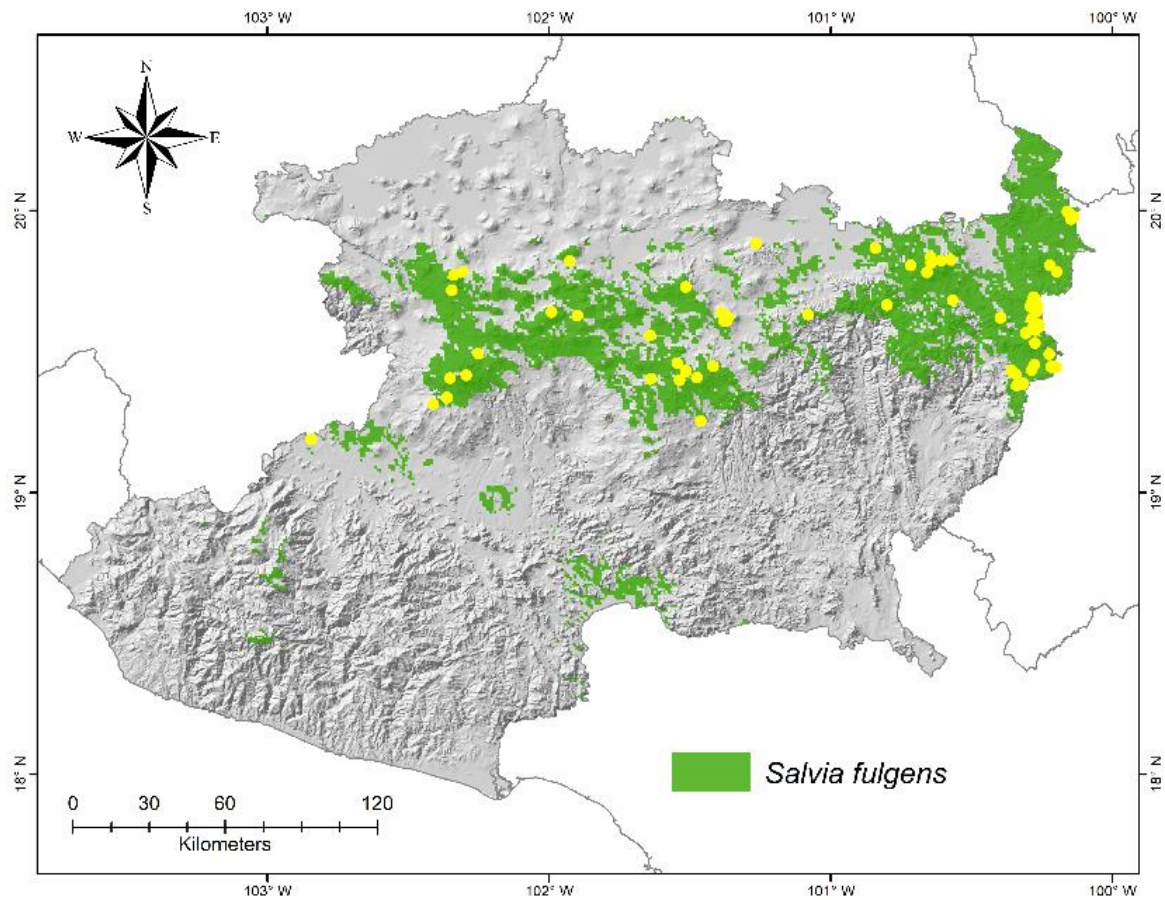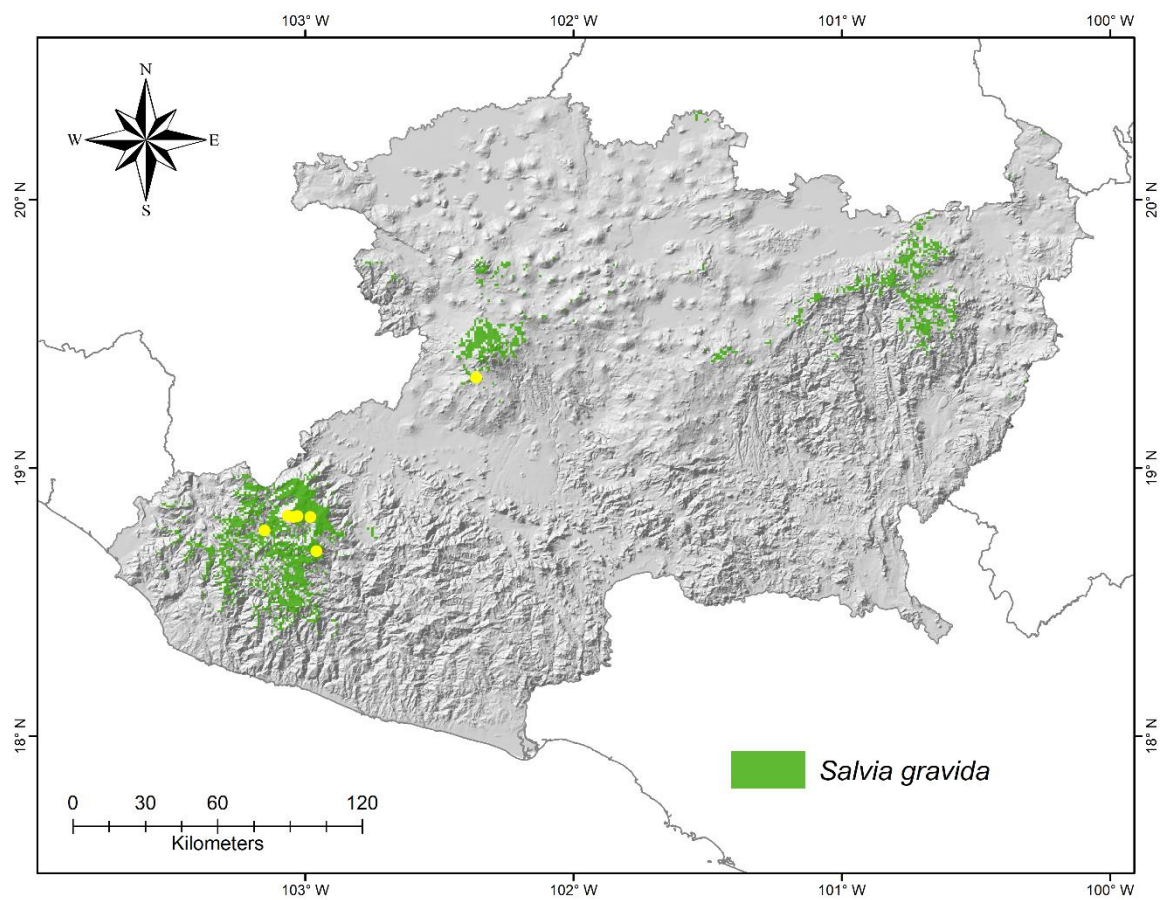

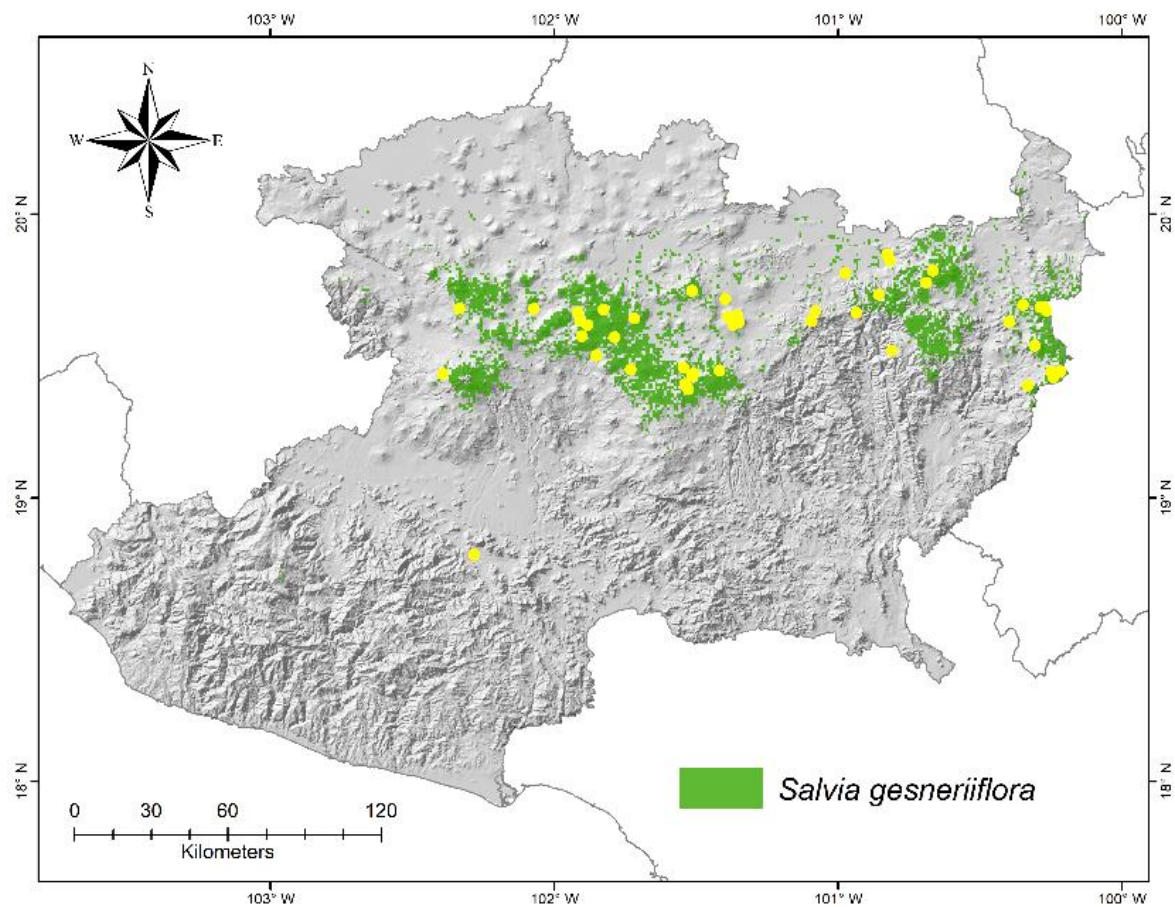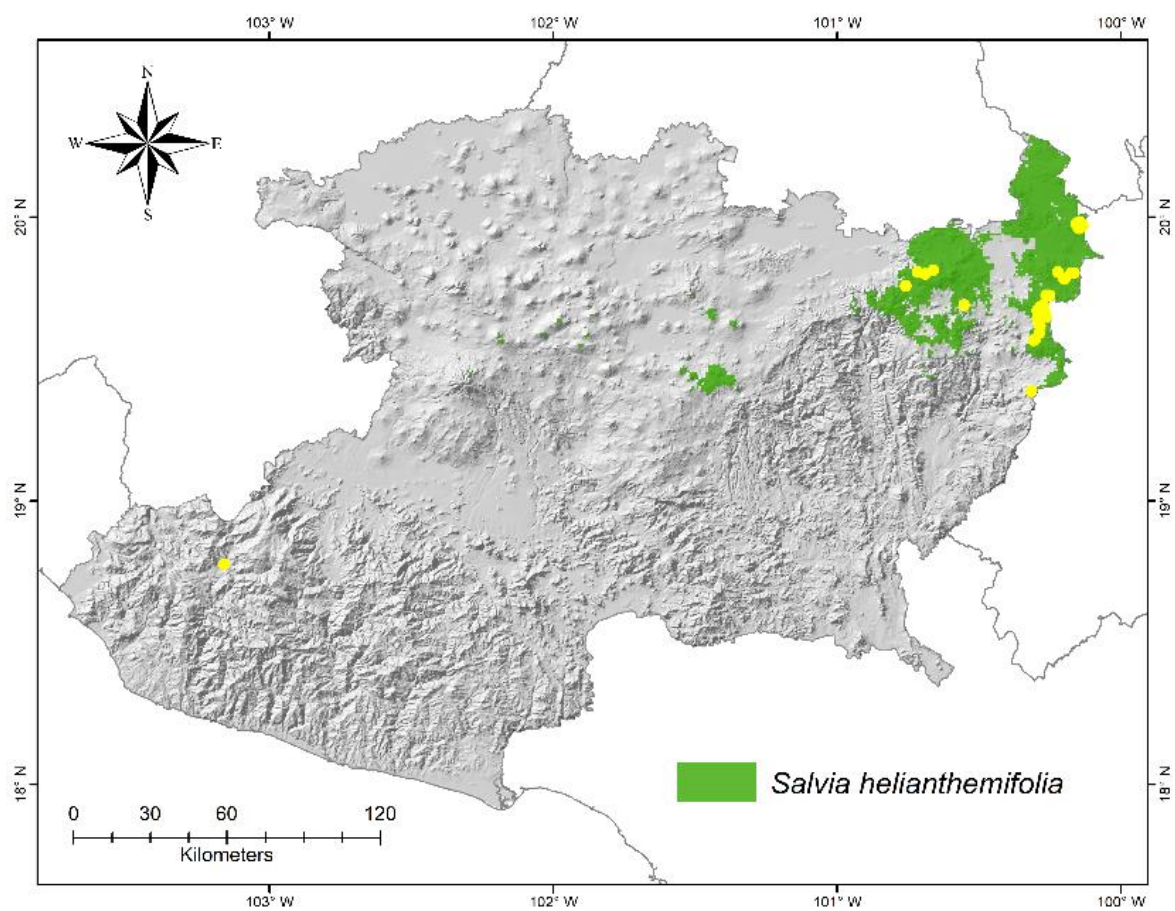



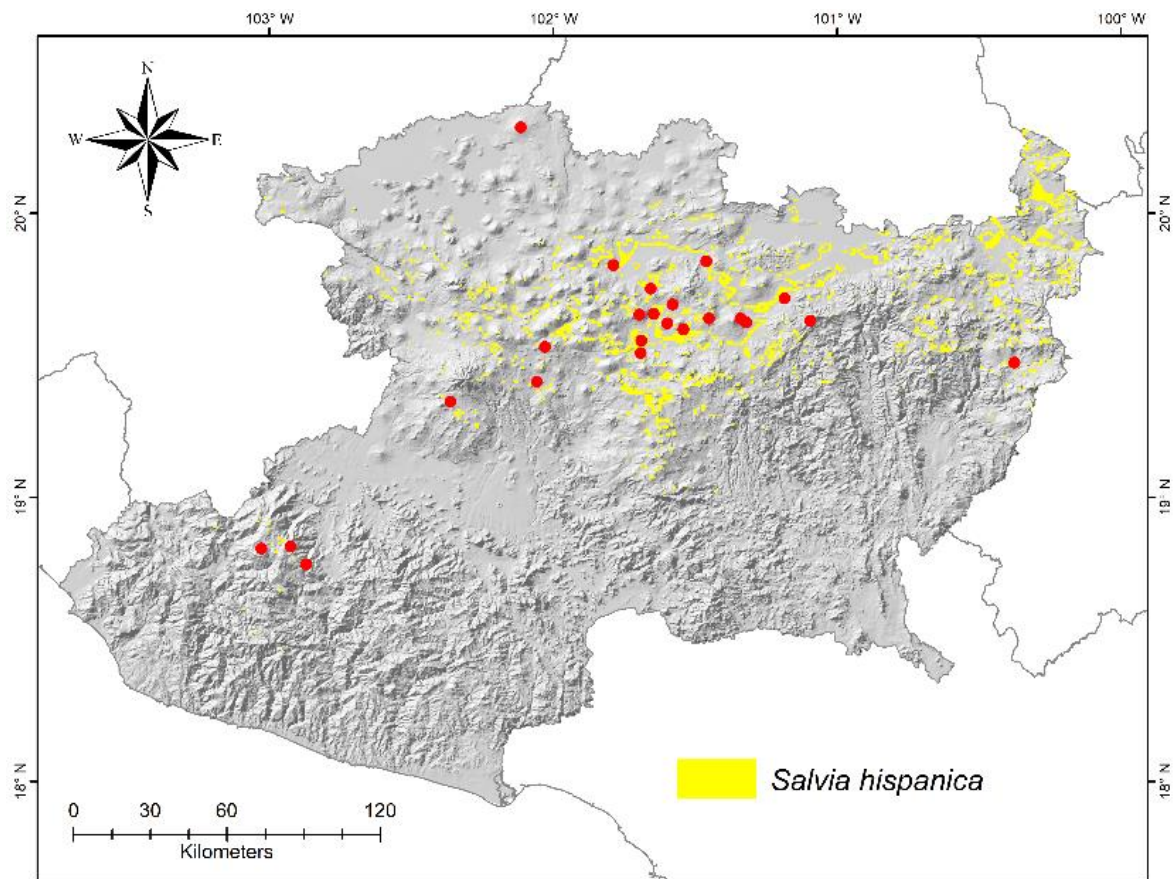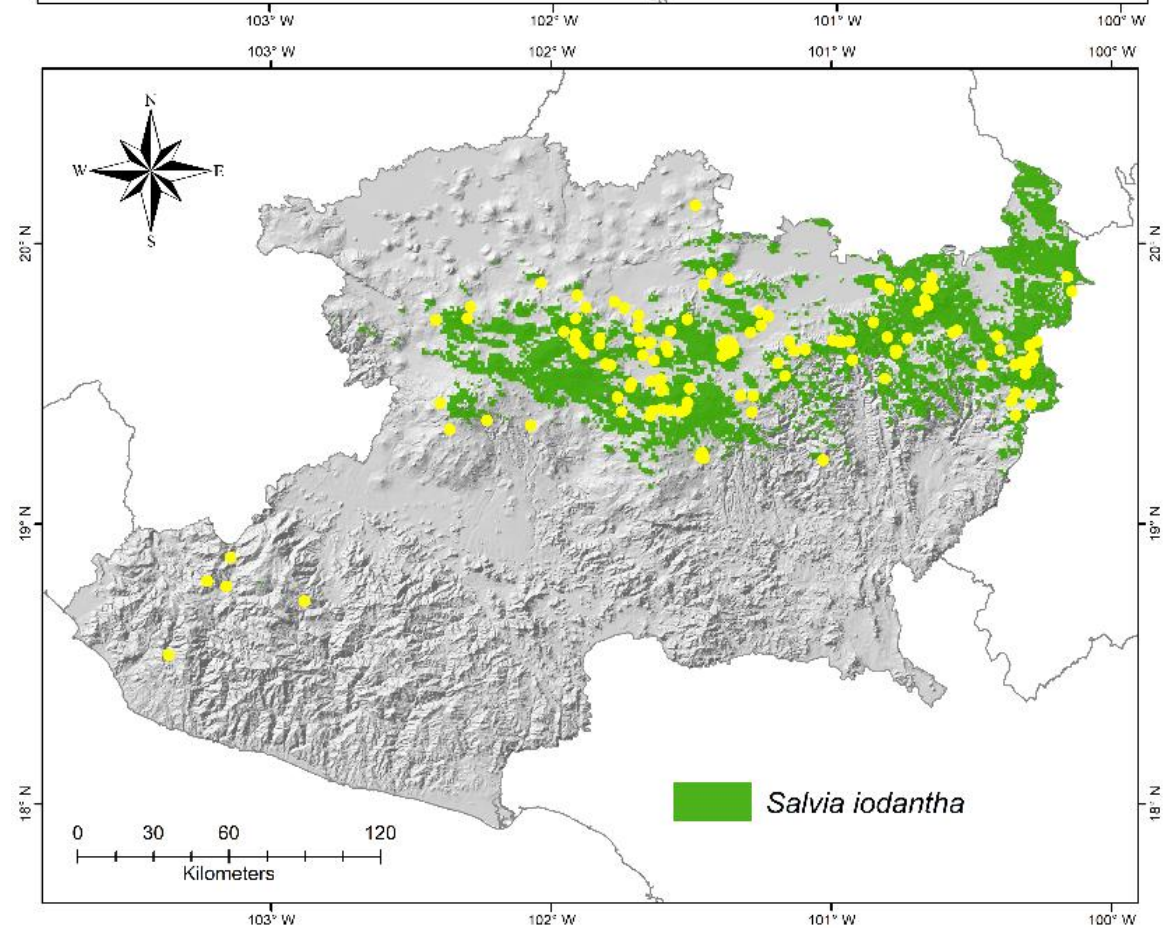

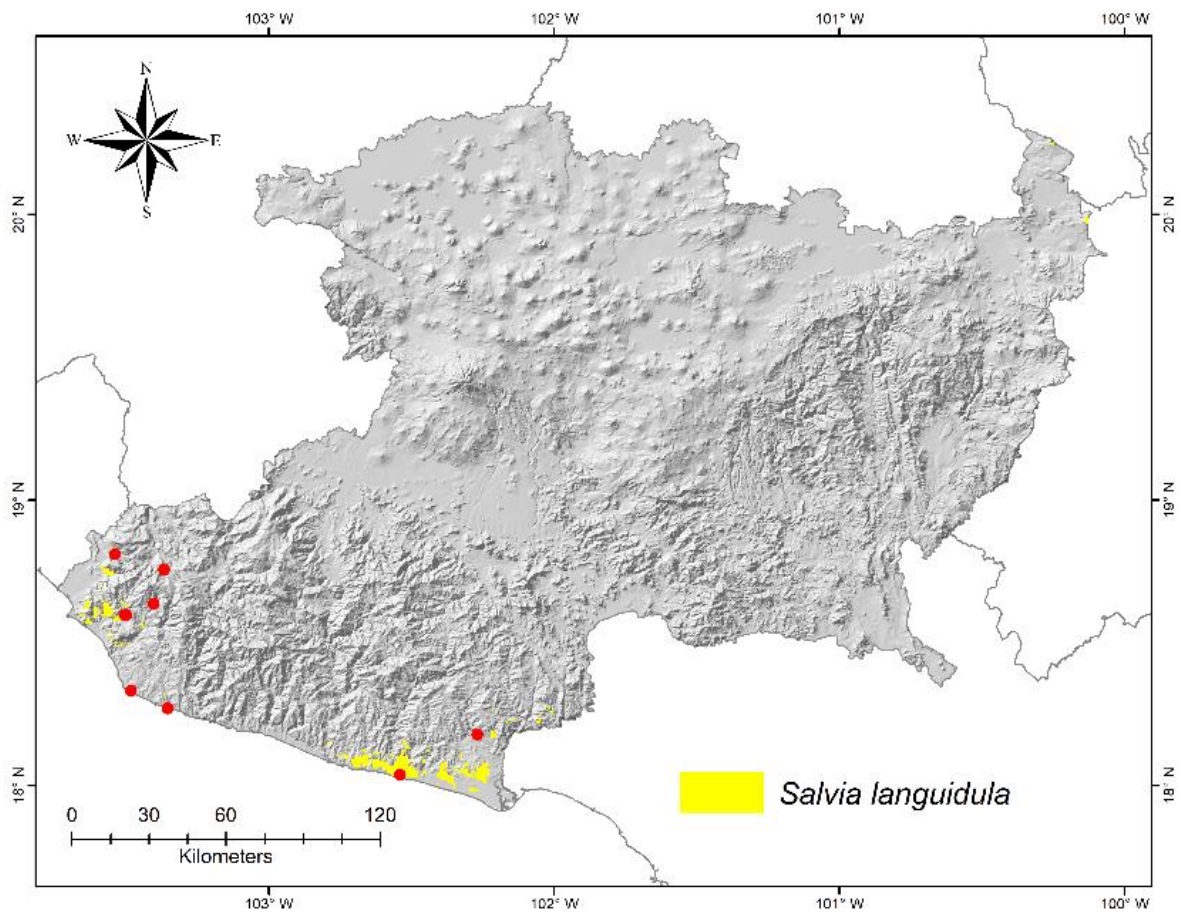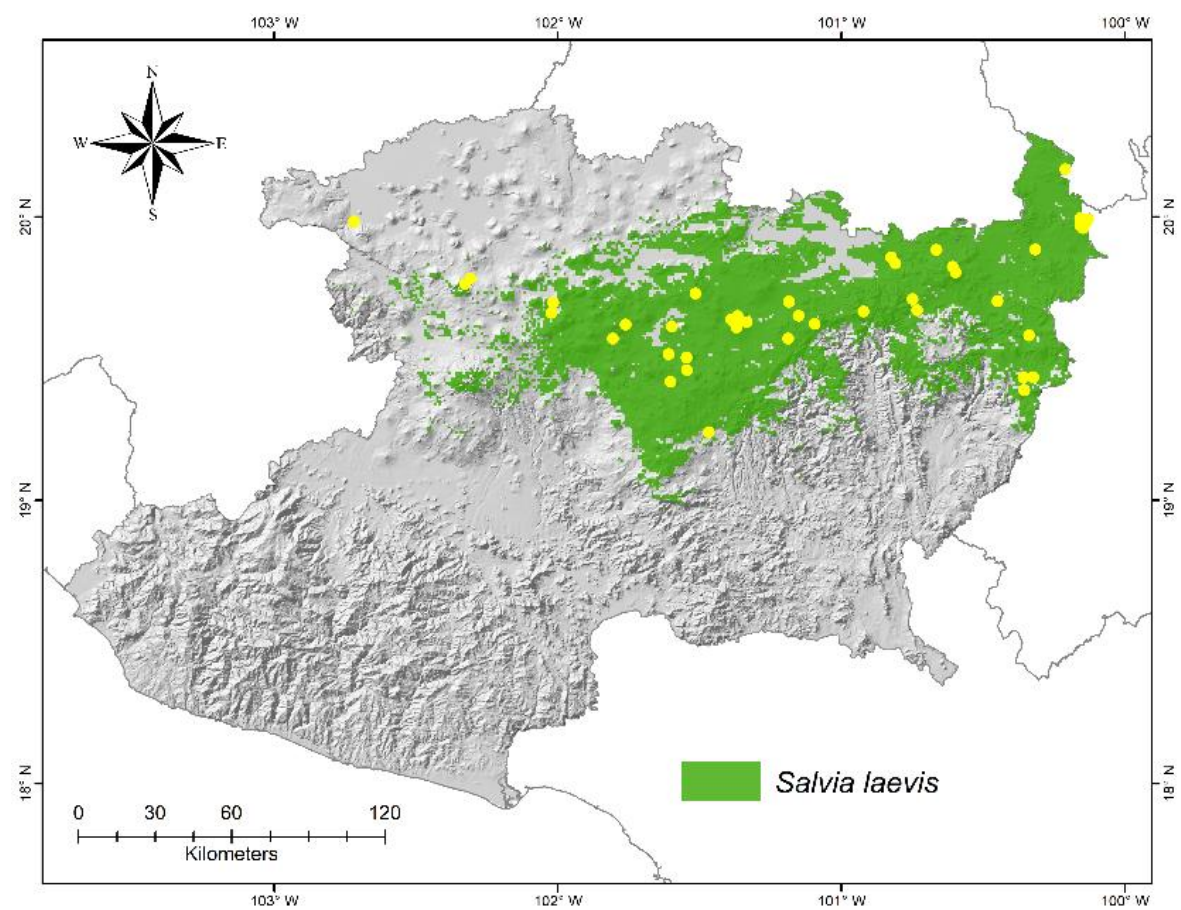



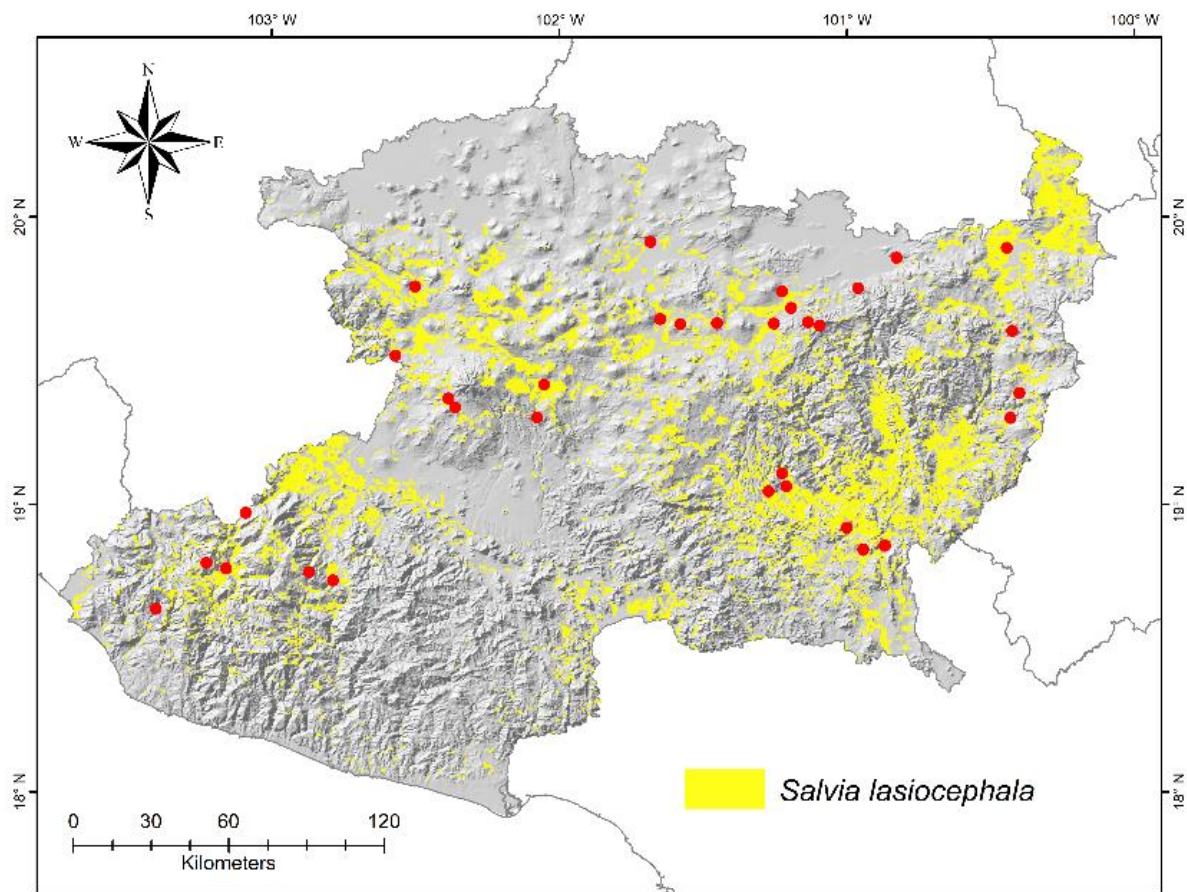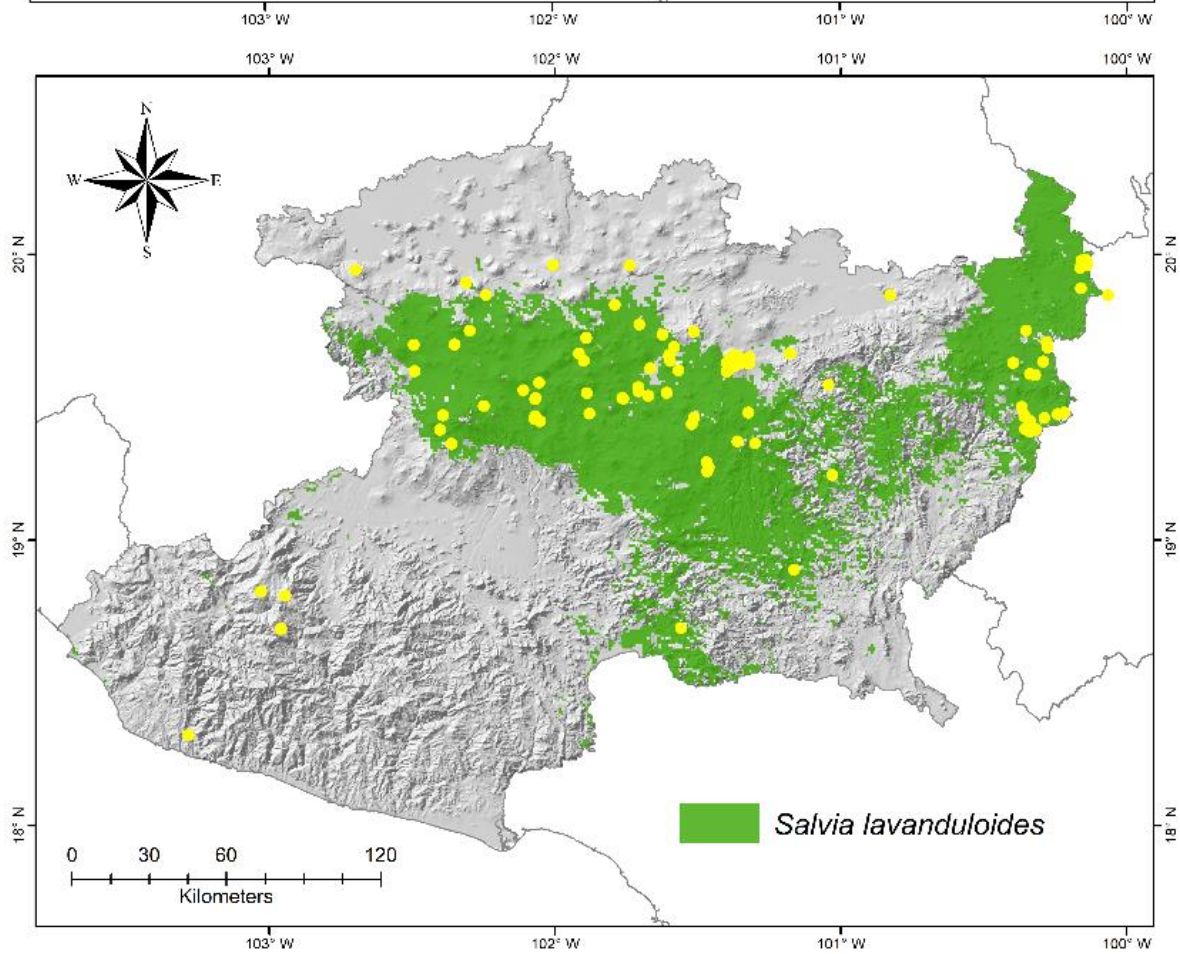

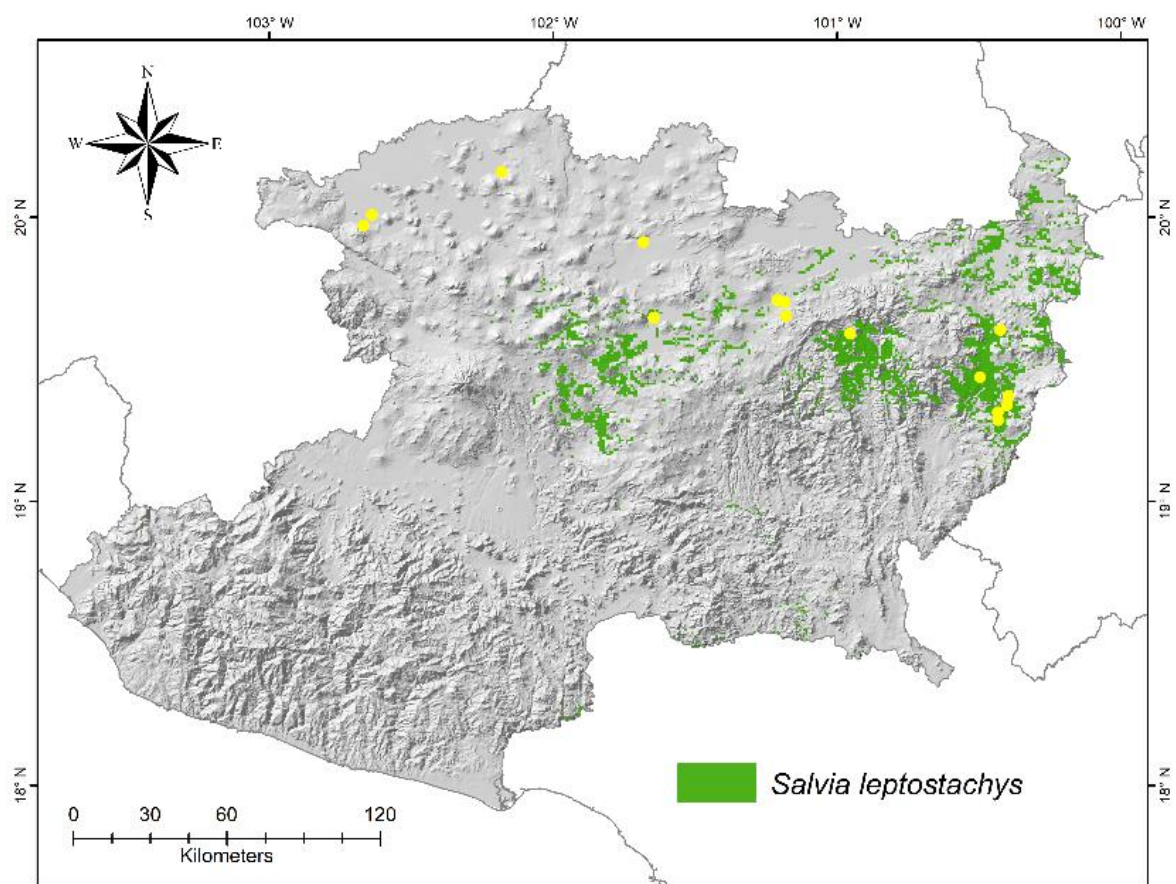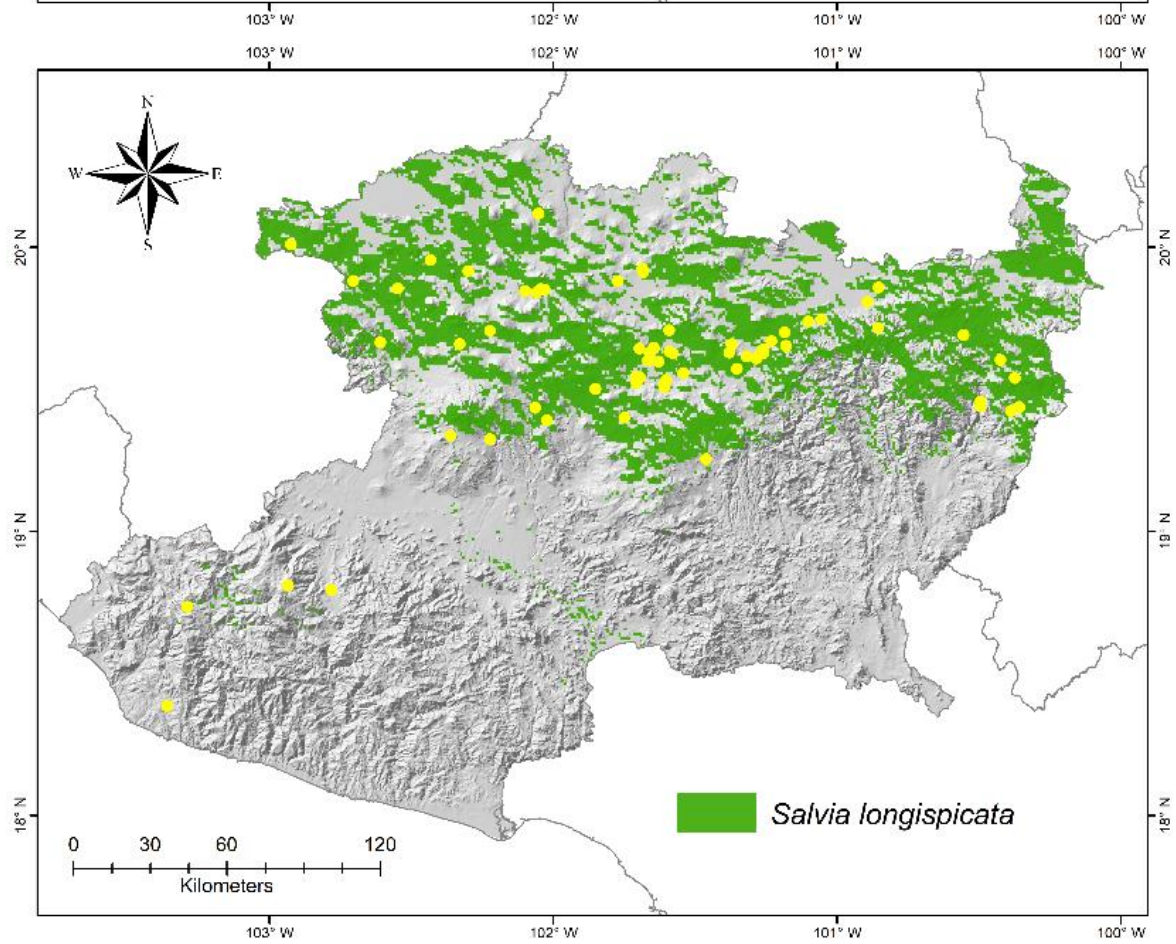



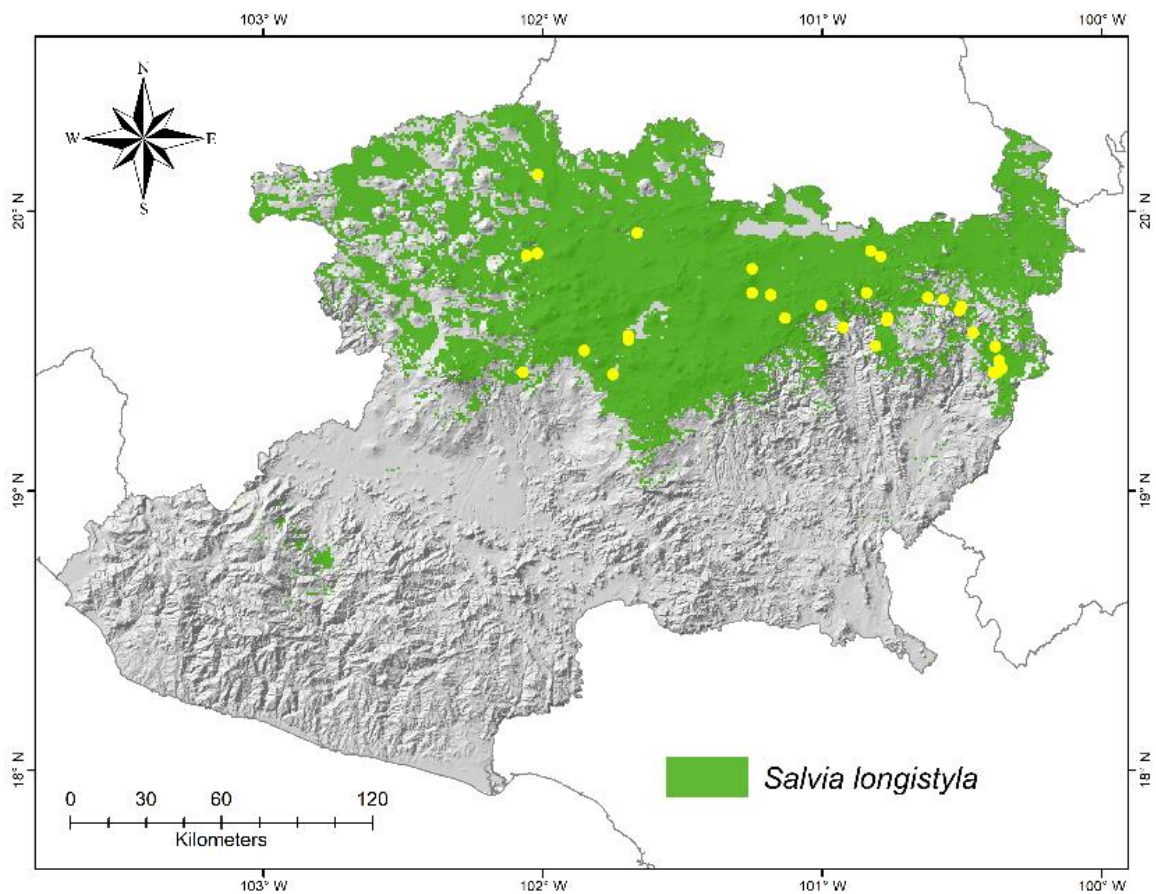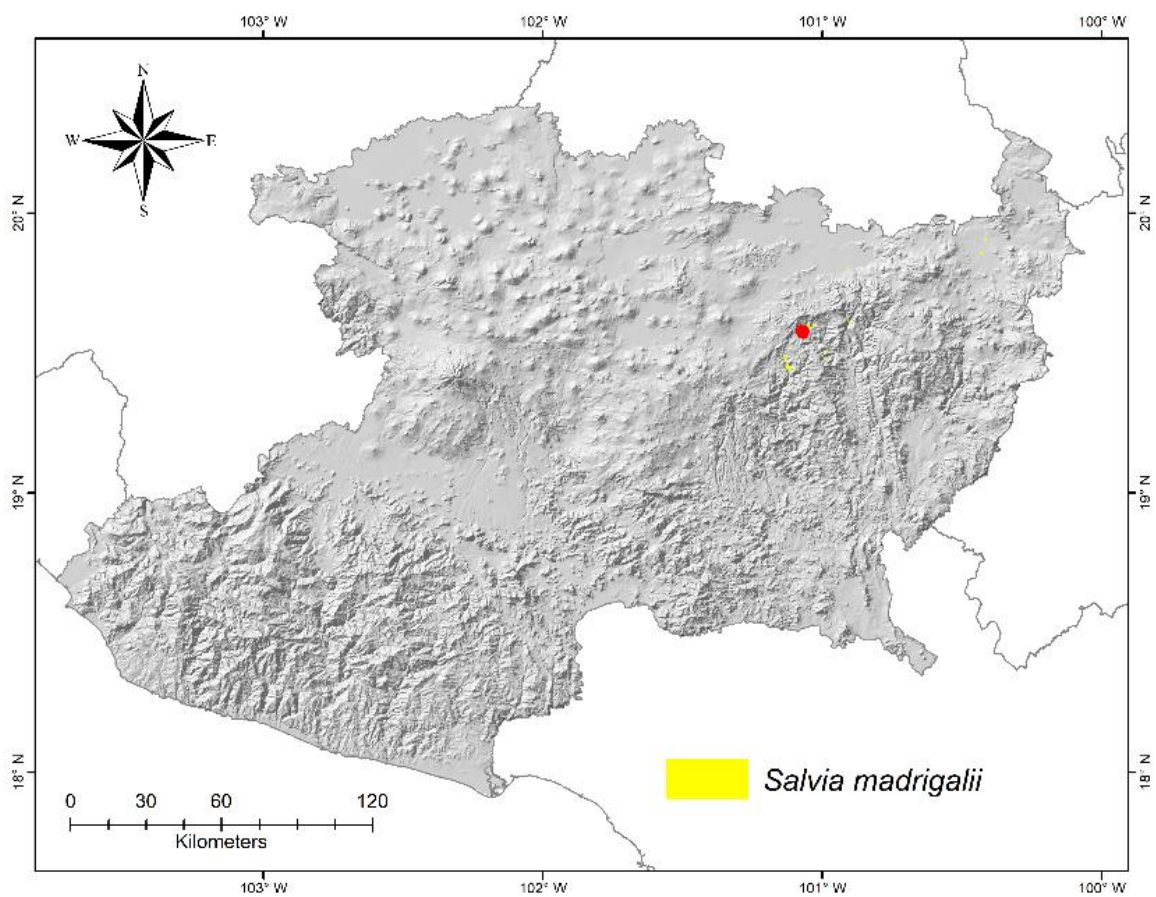

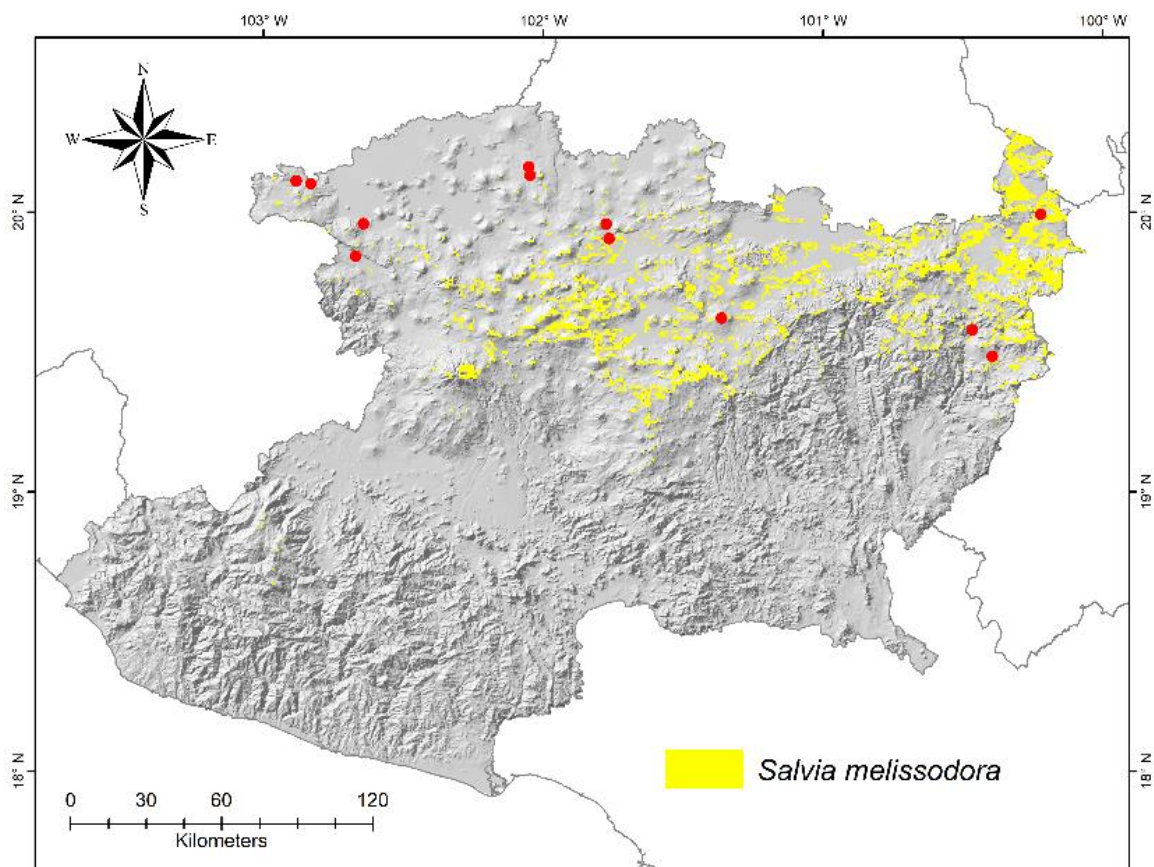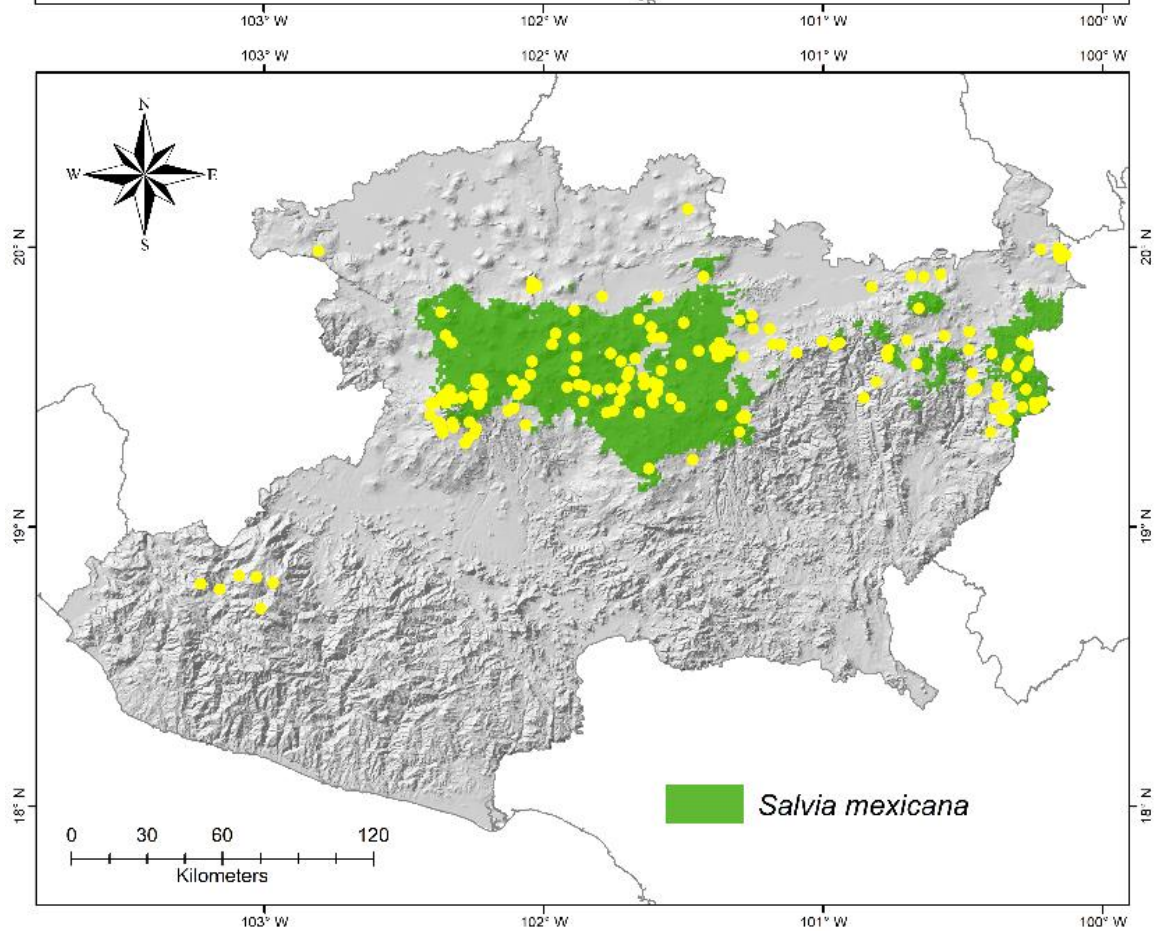



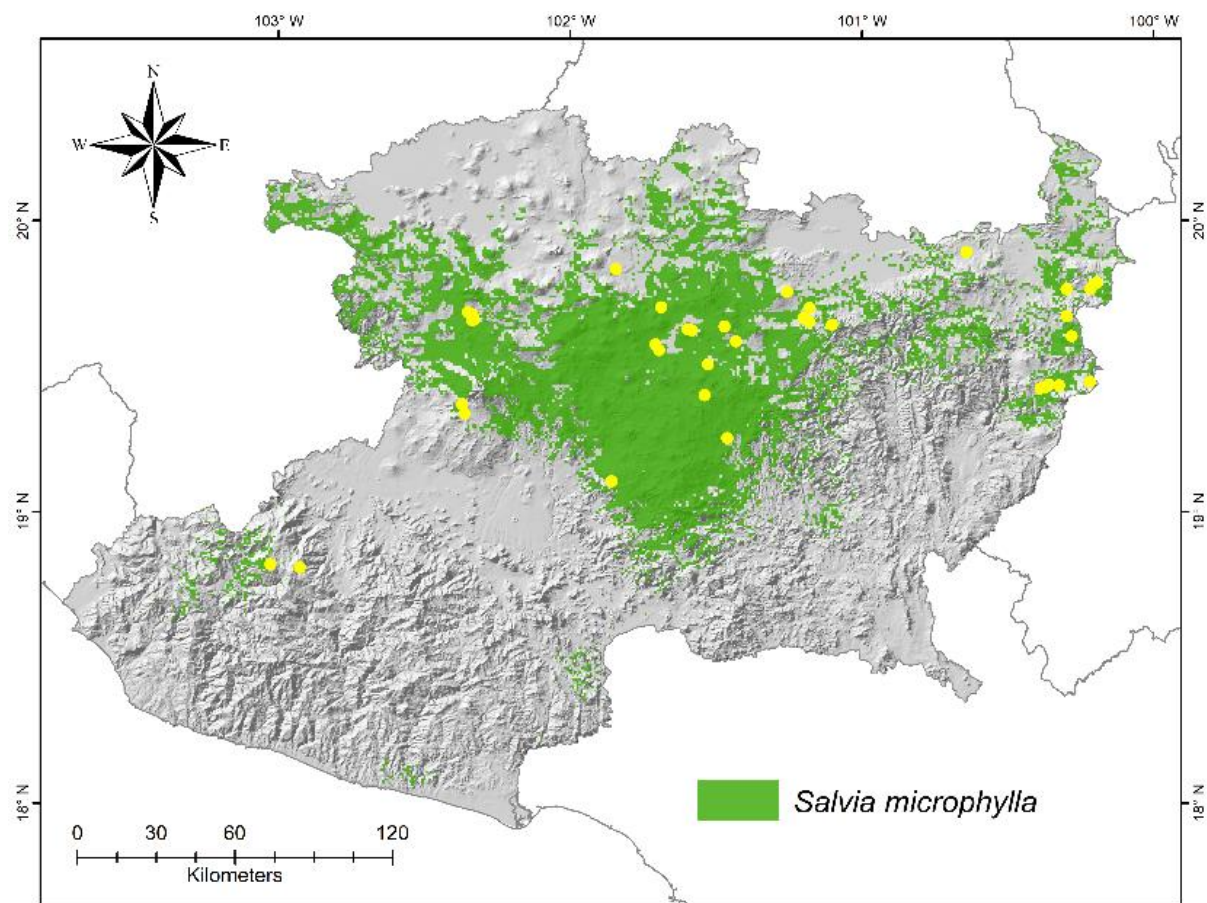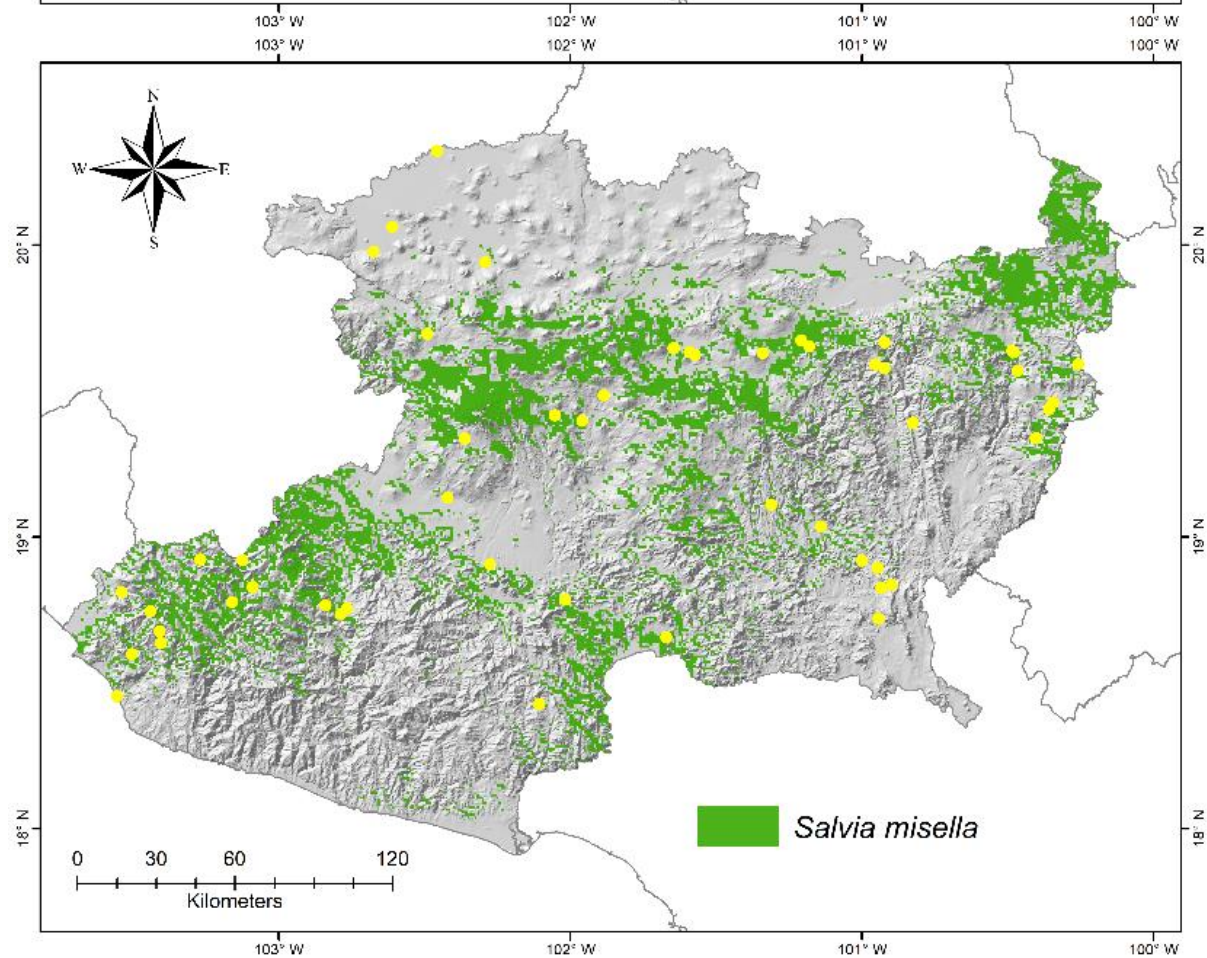

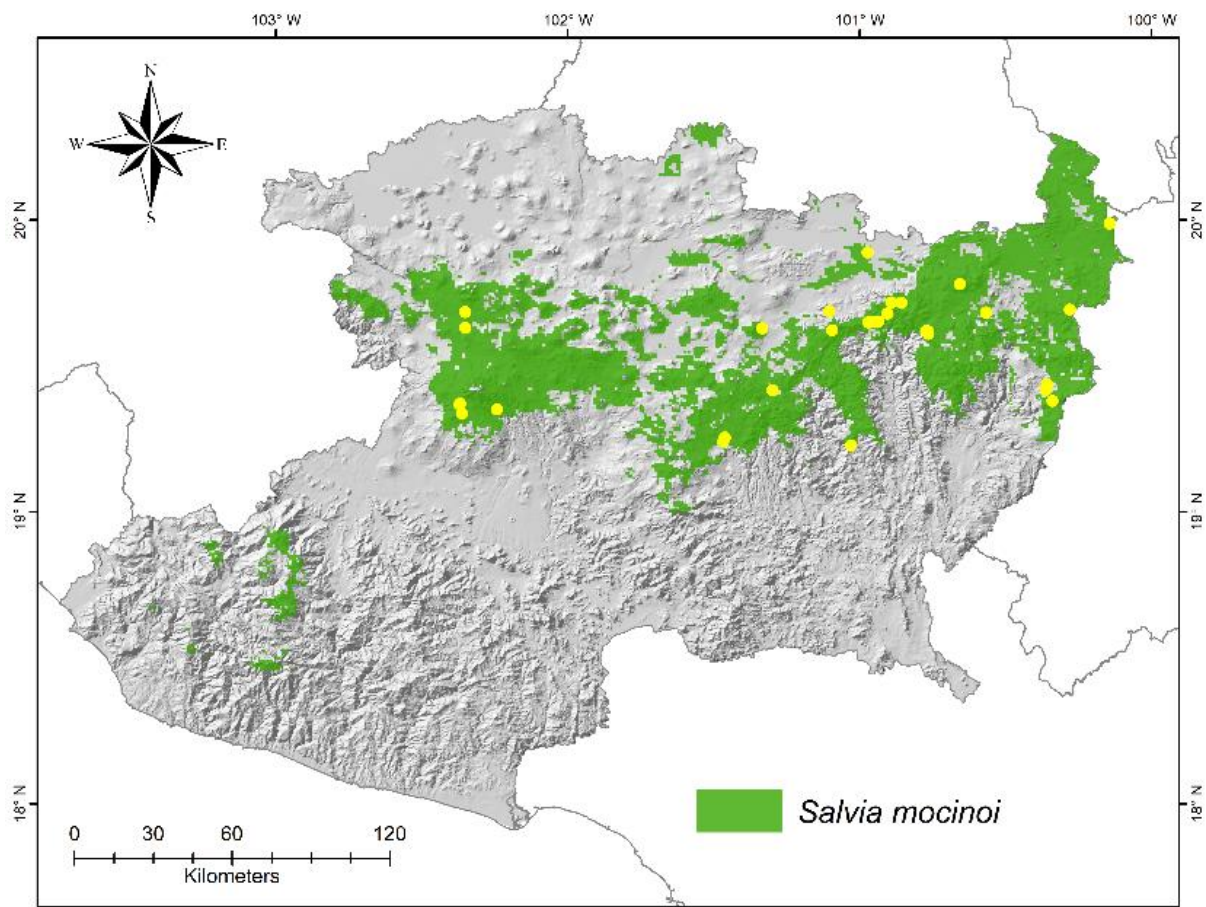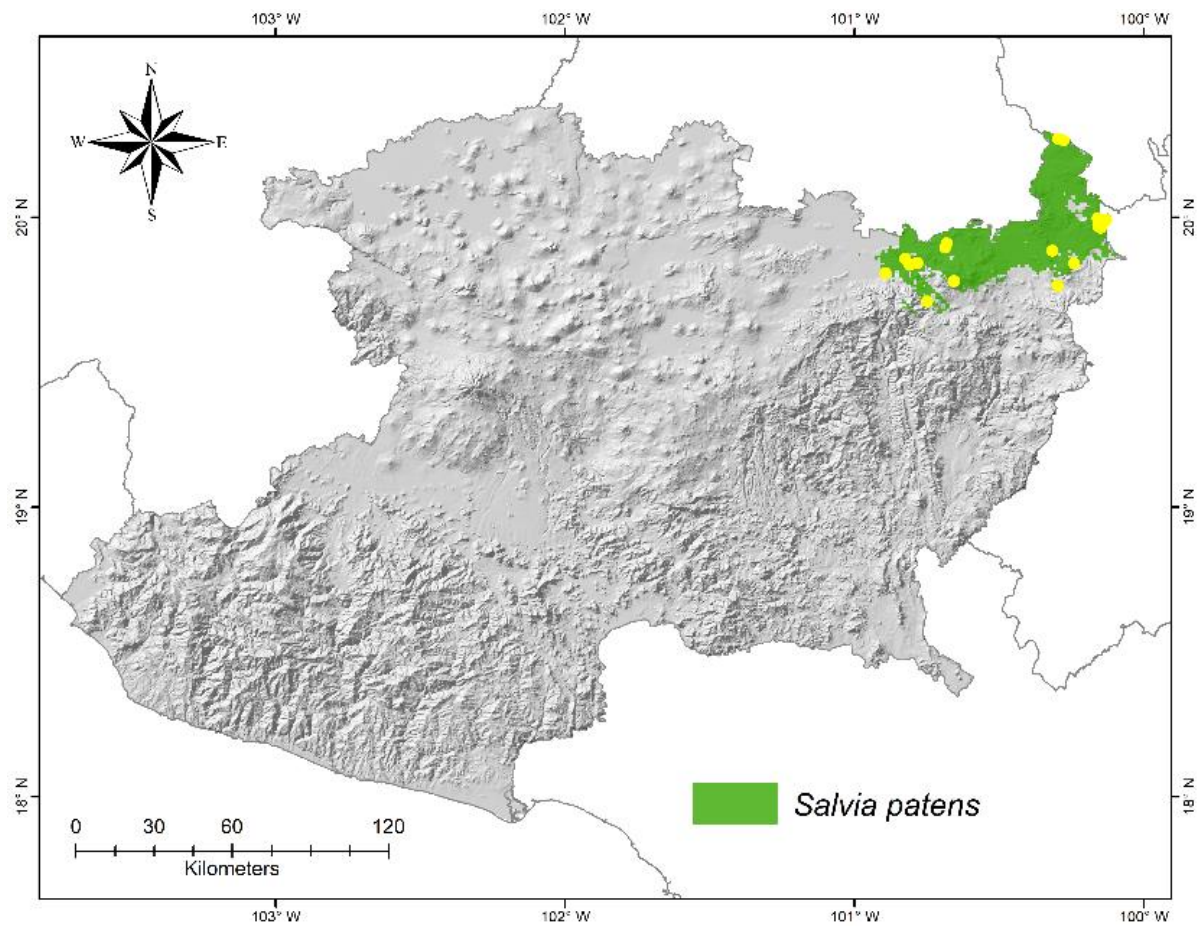



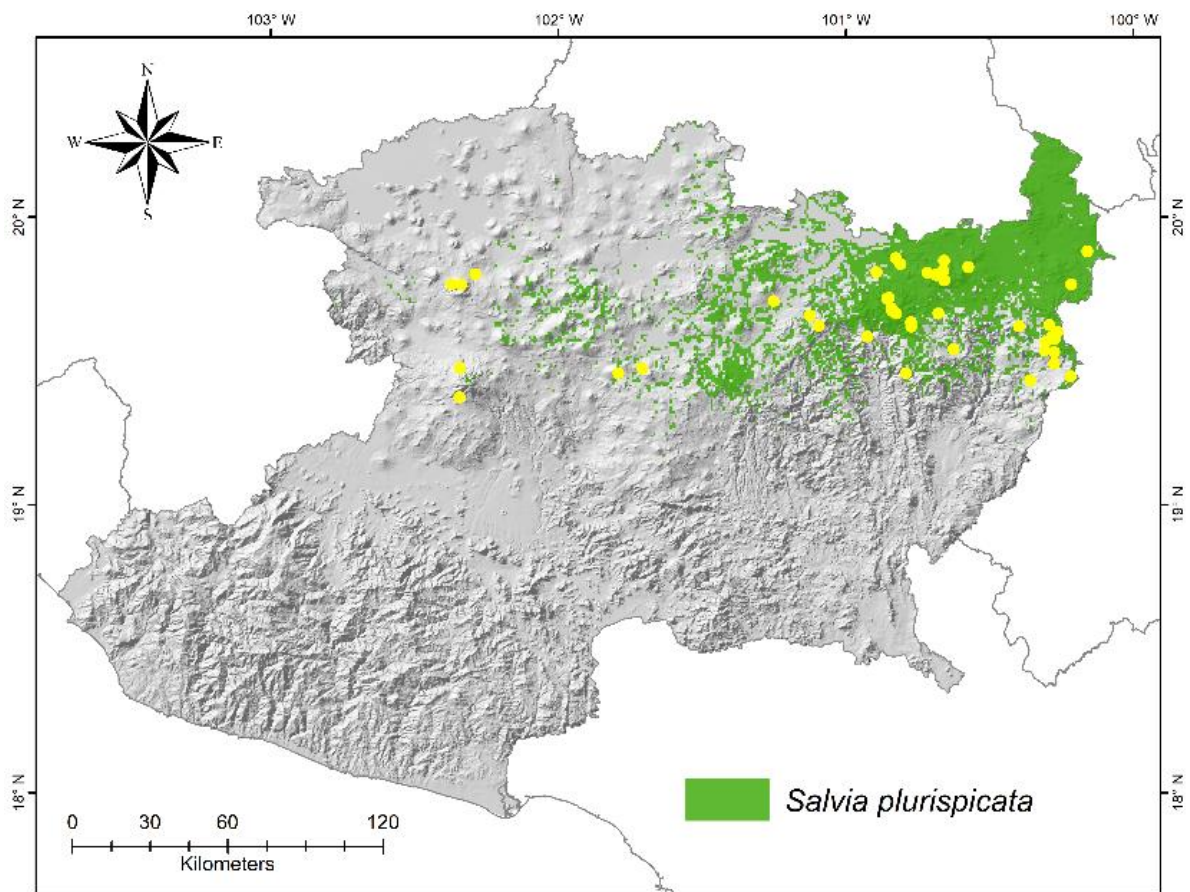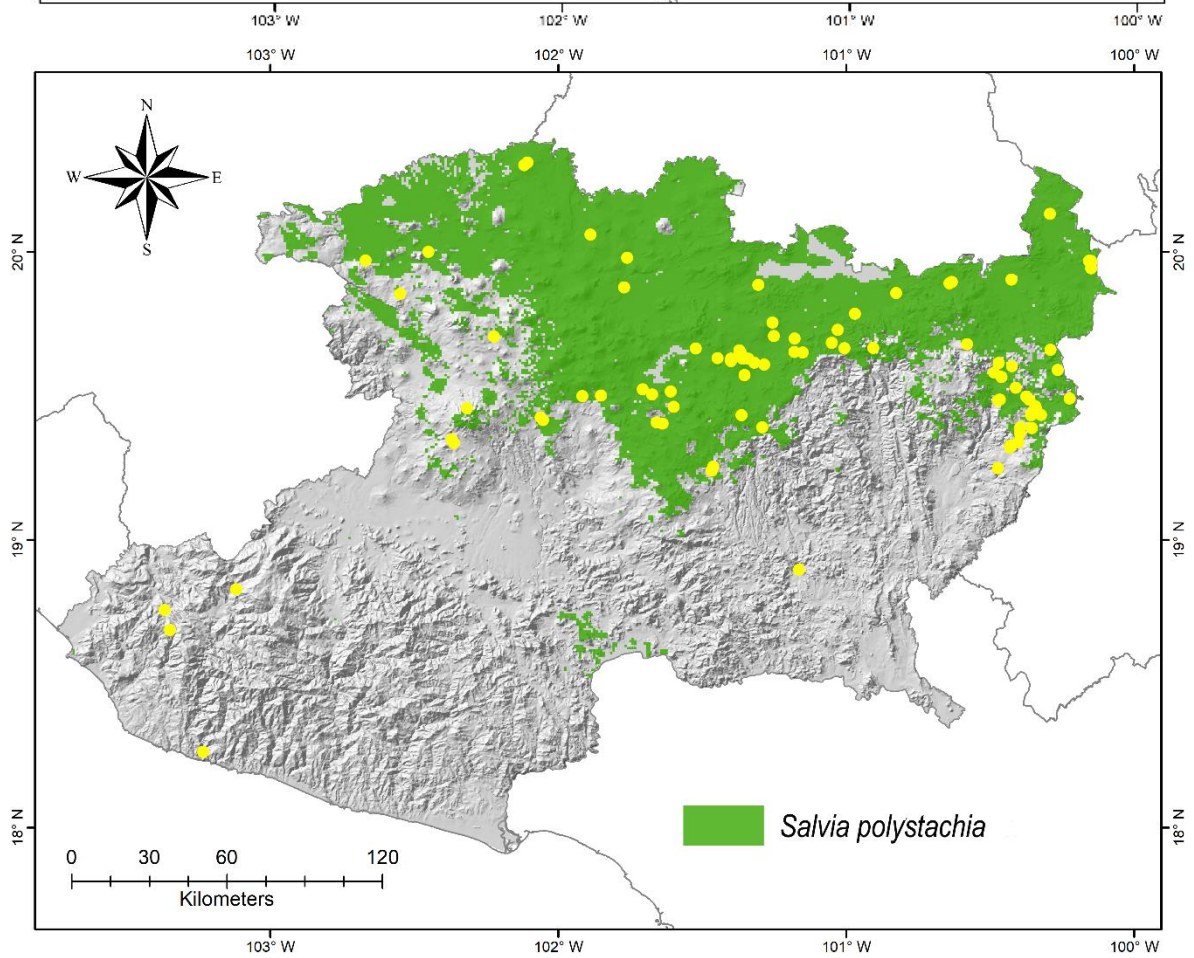

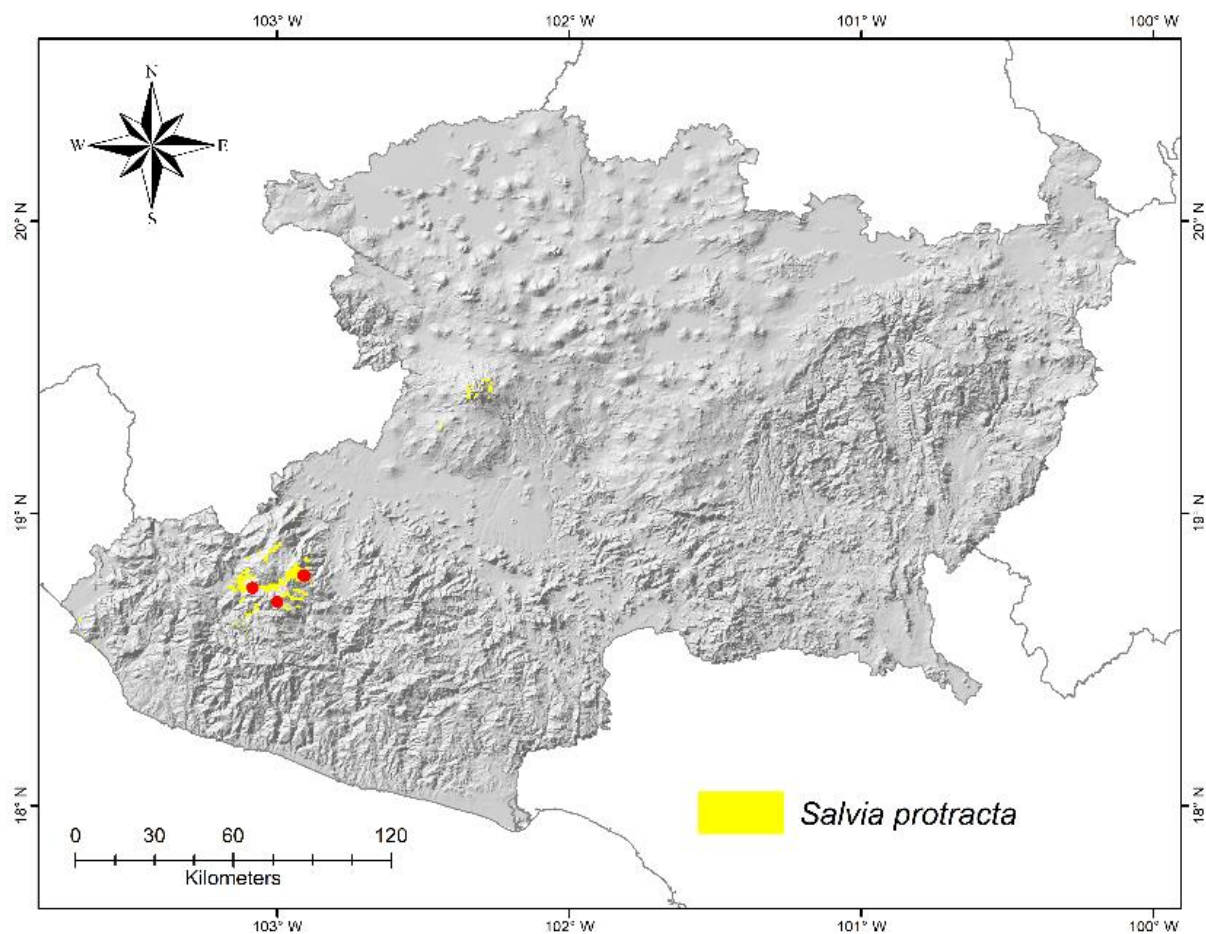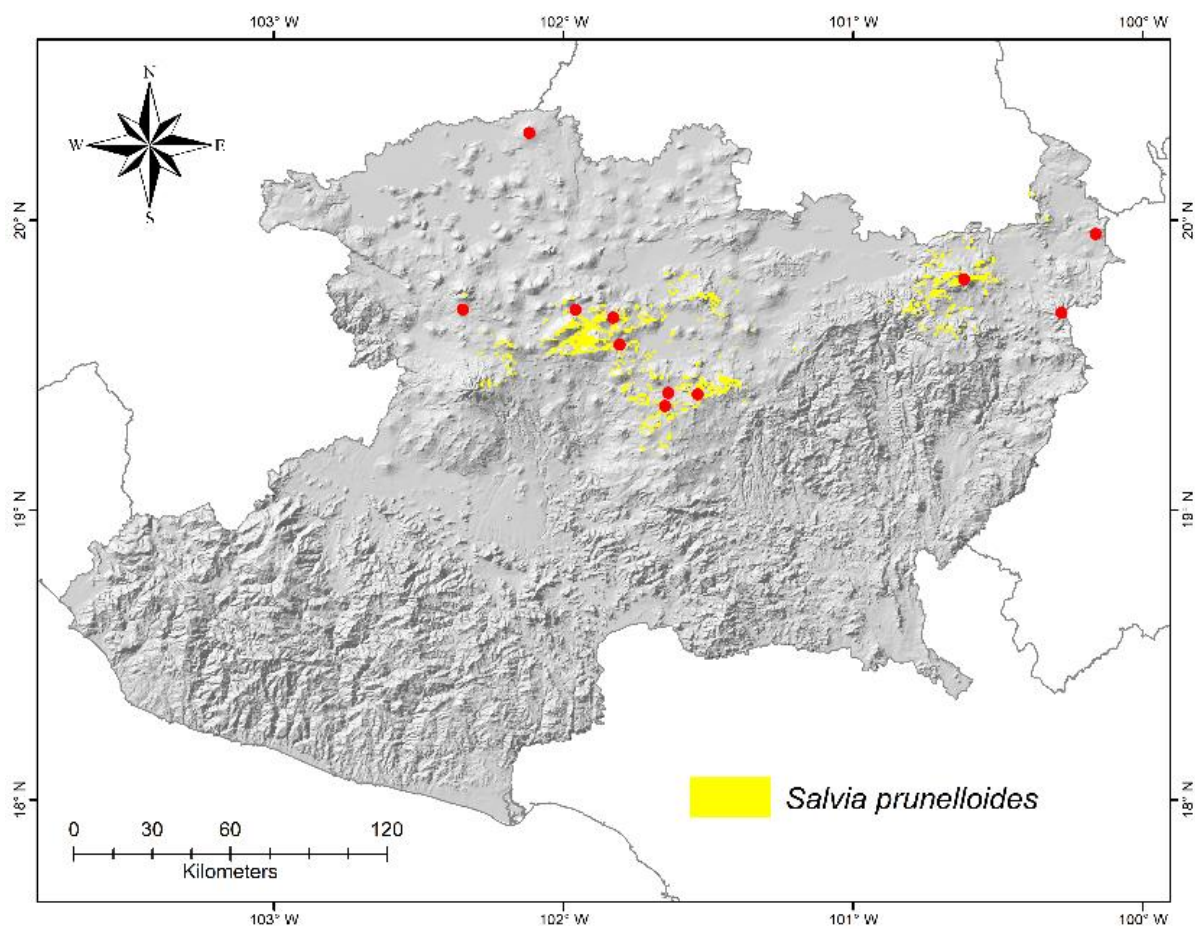



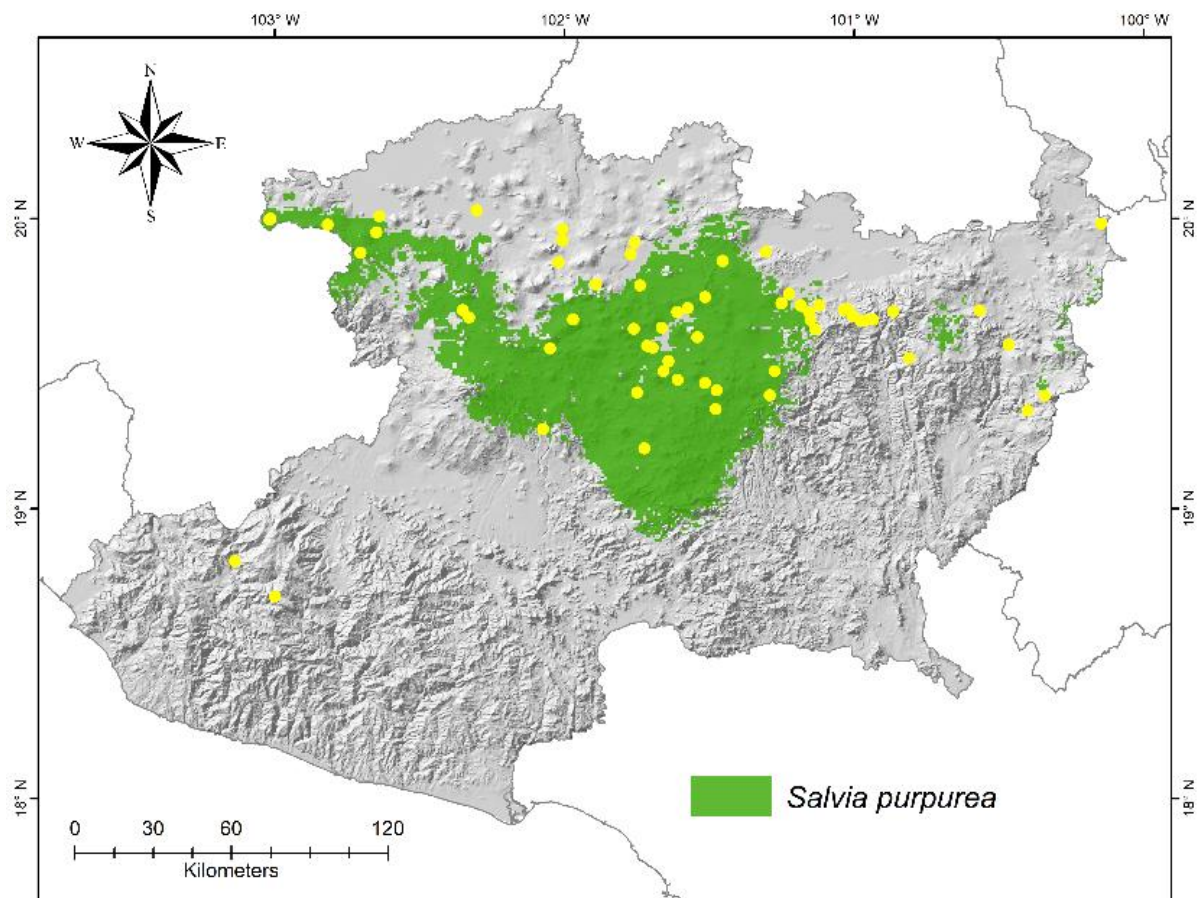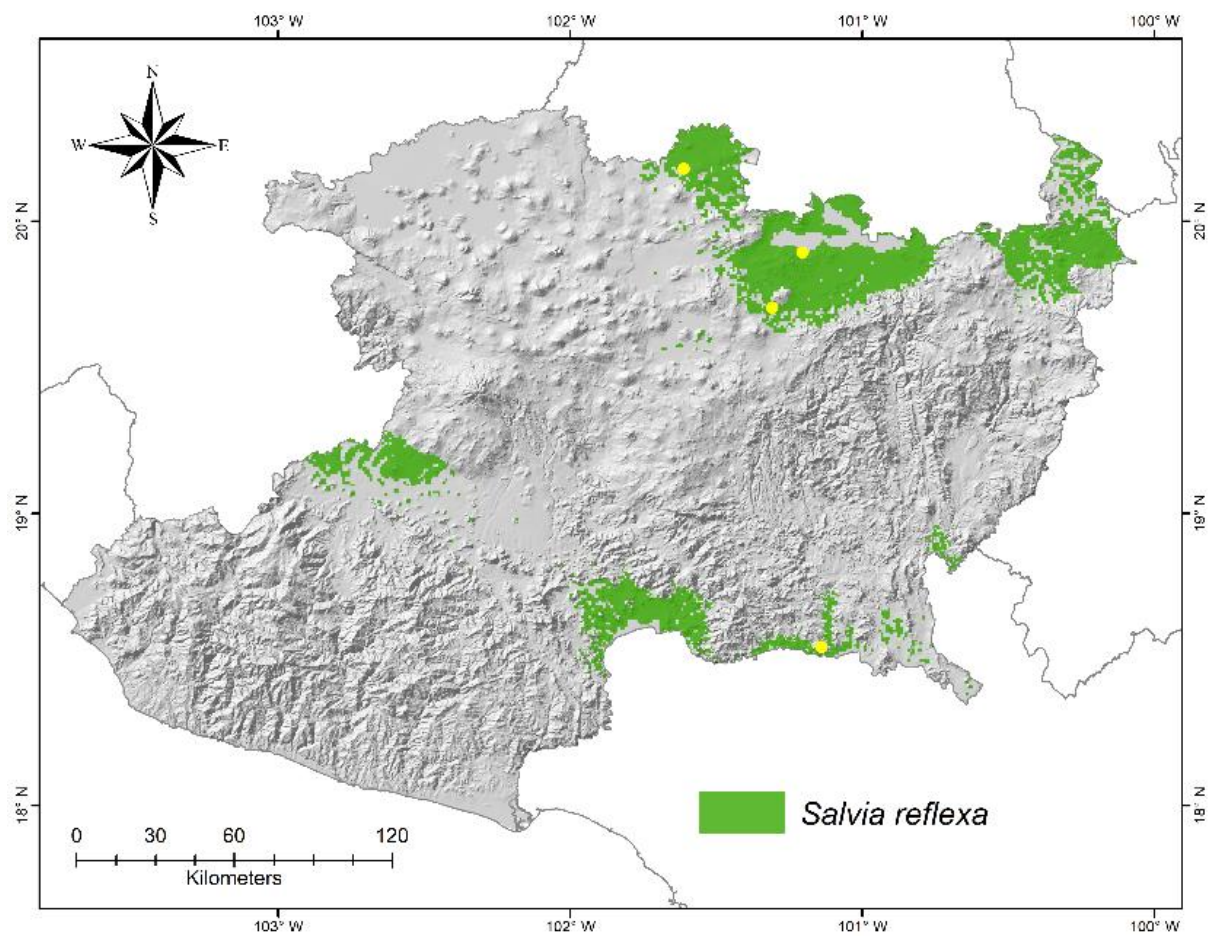

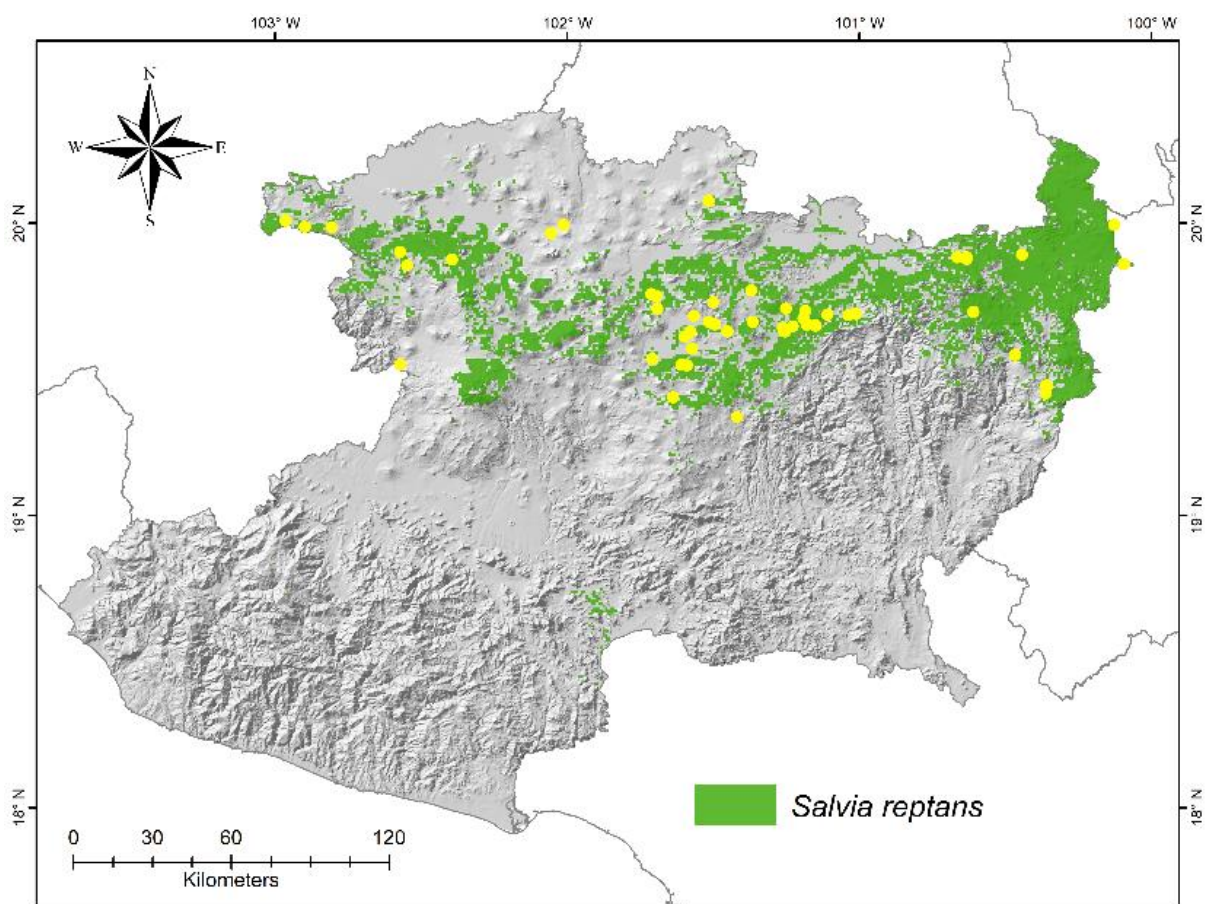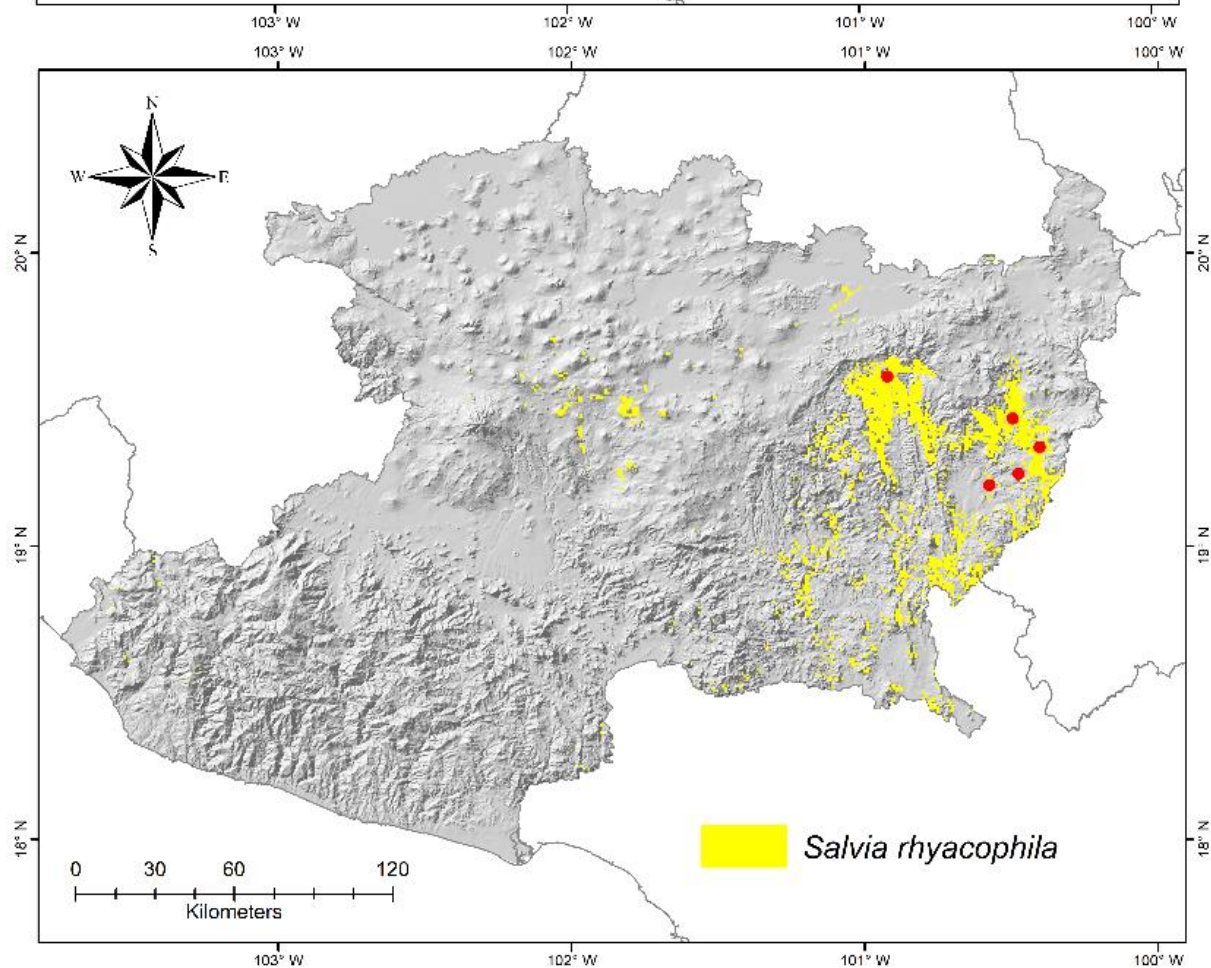



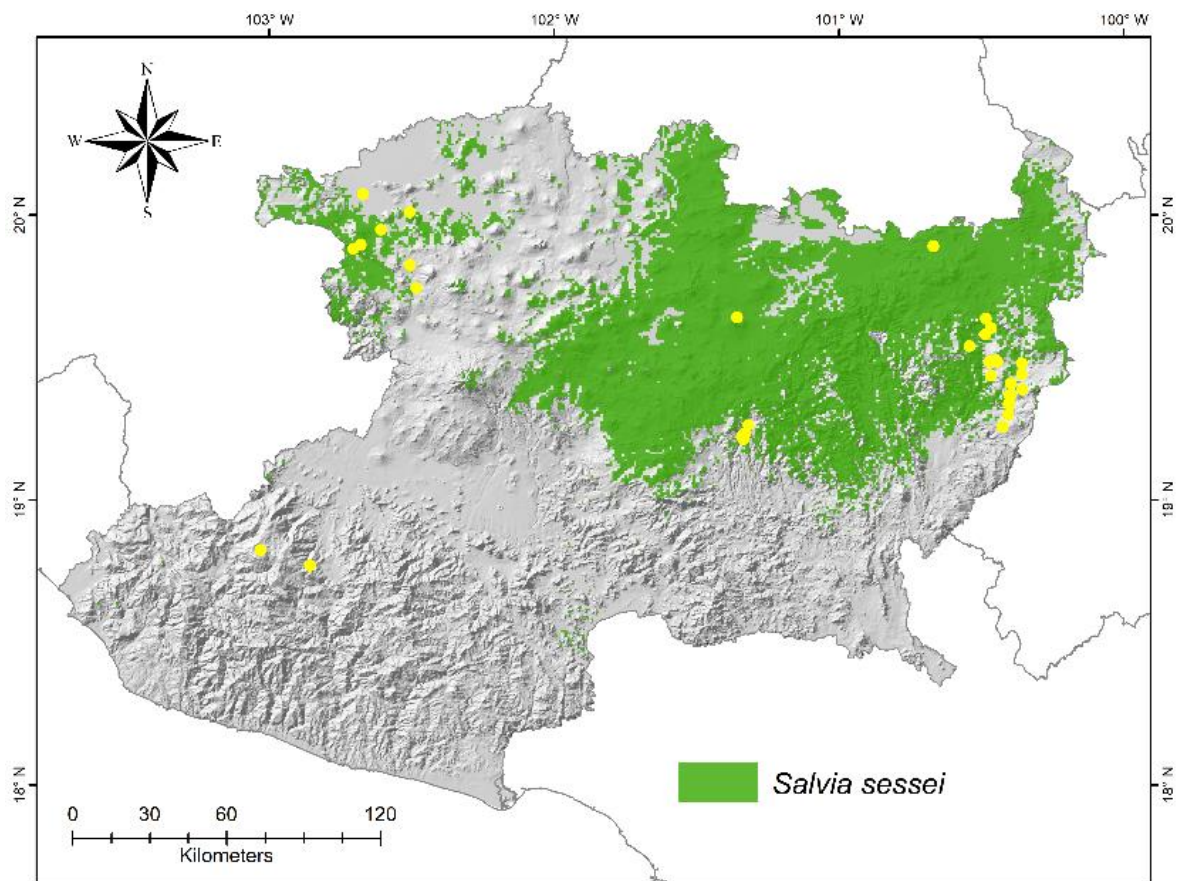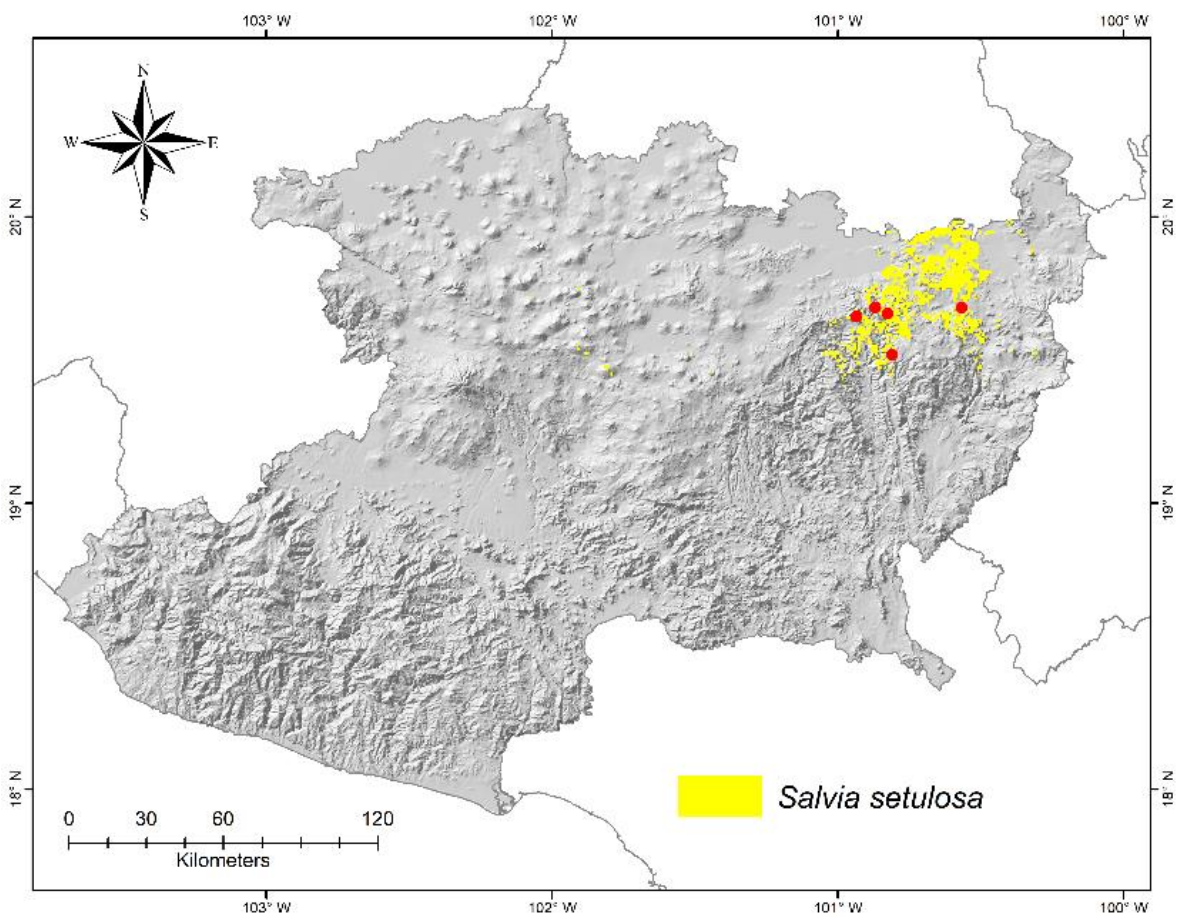

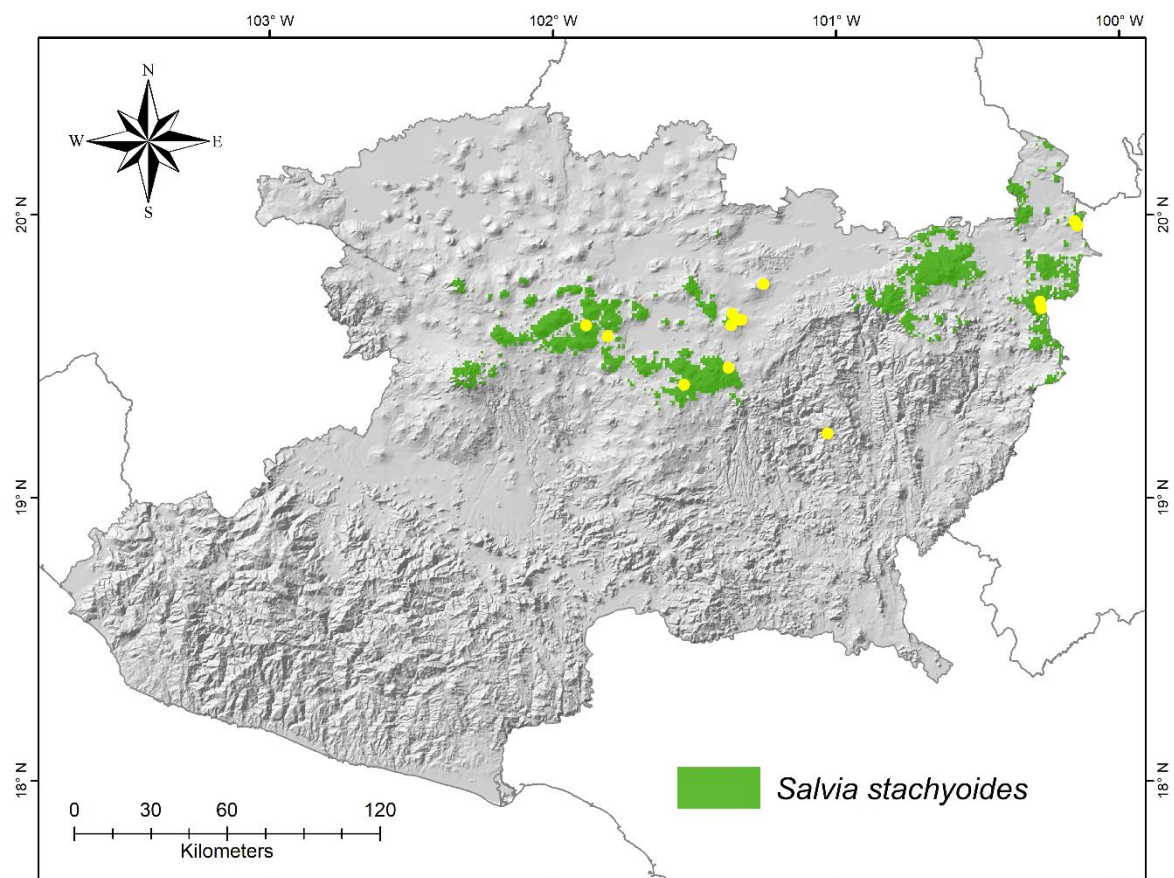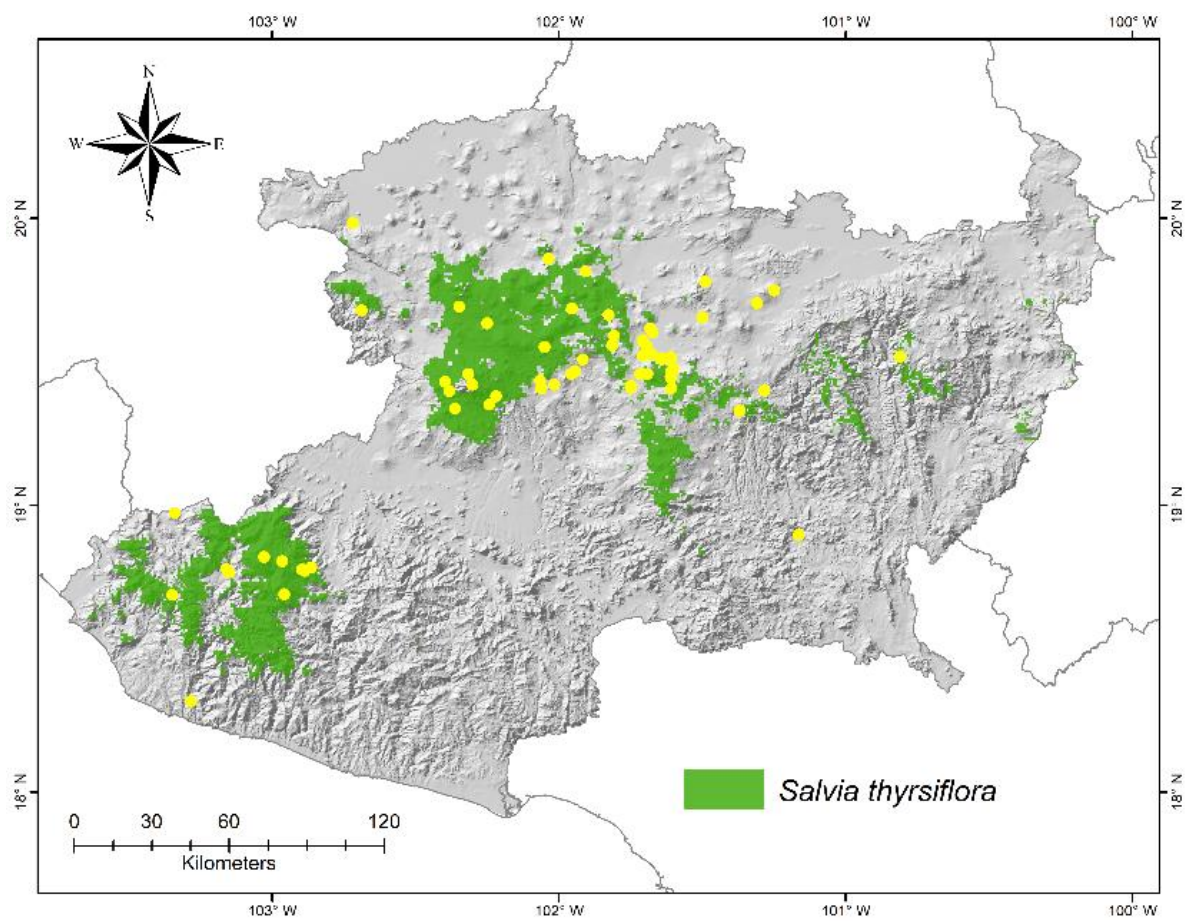



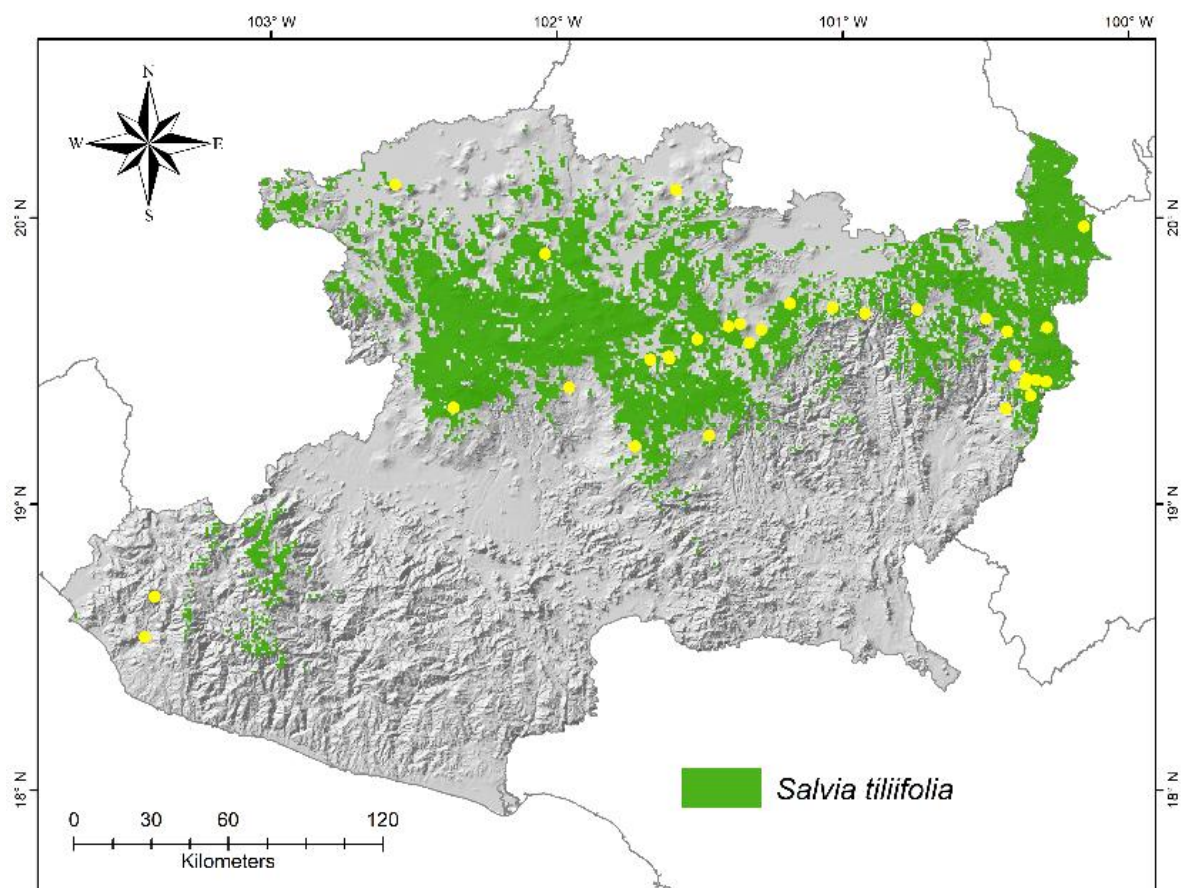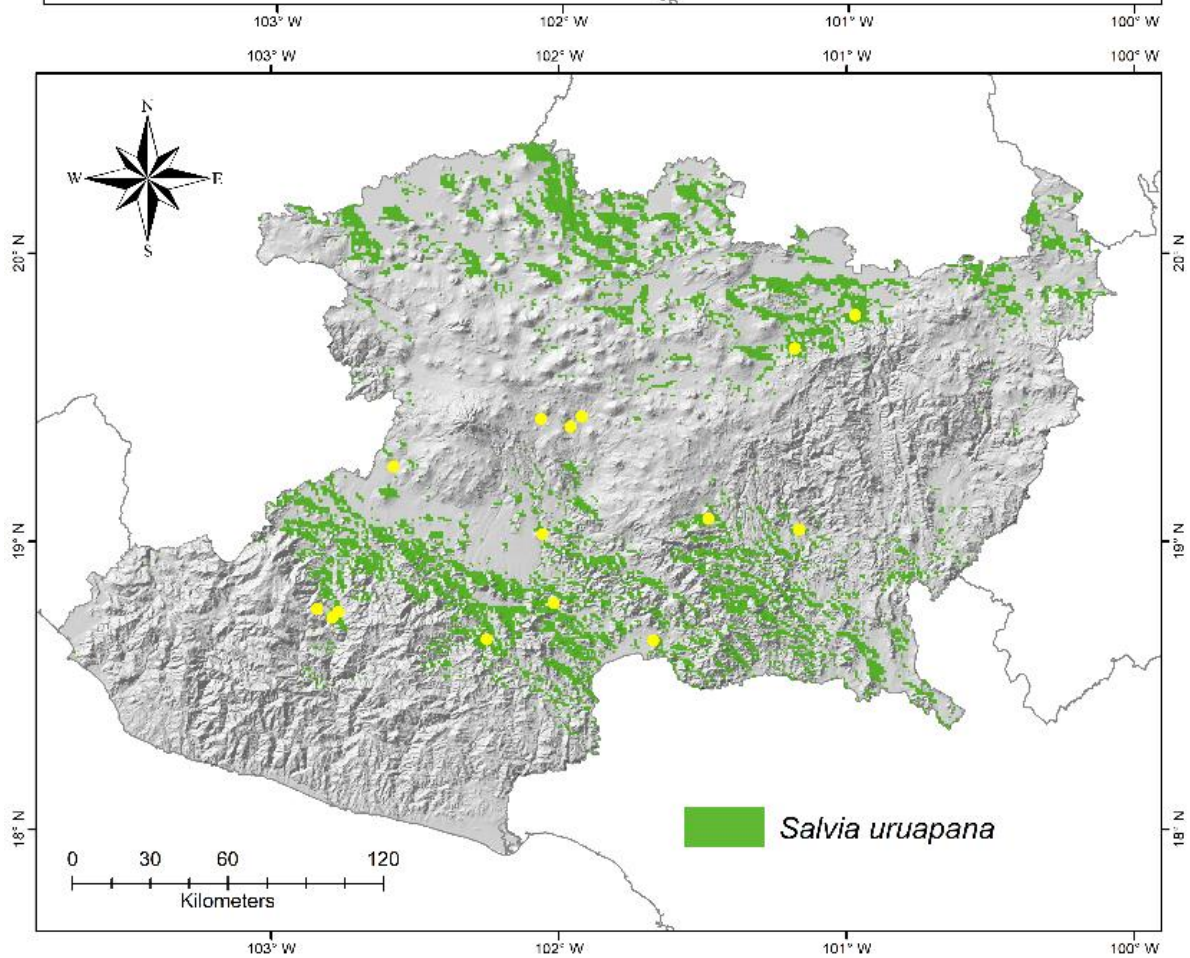

Supplement: Supplementary file
